# Supplementary material for: Towards hybrid quantum mechanical/molecular mechanical simulations of Li and Na intercalation in graphite – force field development and DFTB parametrisation
Source: Royal Society of Chemistry journal article supplement (doi:10.1039/d3cp02765a), 2024-01-01
Supplement: d3cp02765a2.pdf [file d3cp02765a2.pdf]

**Towards Hybrid Quantum Mechanical/Molecular  
Mechanical Simulations of Li and Na Intercalation in  
Graphite - Force Field Development and DFTB  
Parametrisation  
Supplementary Information**

Felix R. S. Purtscher and Thomas S. Hofer\*

Institute of General, Inorganic and Theoretical Chemistry

Center for Chemistry and Biomedicine

University of Innsbruck, Innrain 80-82, A-6020 Innsbruck, Austria

Tel.: +43-512-507-57111

Fax: +43-512-507-57199

December 12, 2023

---

\*Corresponding author: t.hofer@uibk.ac.at

---

## S1 Slater-Koster Table Creation - Details

Figure S1 displays a comparison between the original C-C Slater-Koster table and the recreation carried out in this work. Note that the single deviating line is not actually deviating and only a result of the program-immanent conventions as only the absolute values of Hamiltonian and overlap stored in the Slater-Koster table are relevant. Inverting the sign would lead to a corresponding identical line. The Hubbard derivative of sodium deviates by 0.0001 from the respective 3ob value, which is probably a result of employing a different parametrisation software and the influence on the calculation likely is negligible. In general, the generated one-center parameters are comparable with data from previous work of Wahiduzzaman et al.<sup>[1]</sup> The observed good agreement confirms that the workflow to achieve a DFTB parametrization was properly implemented.

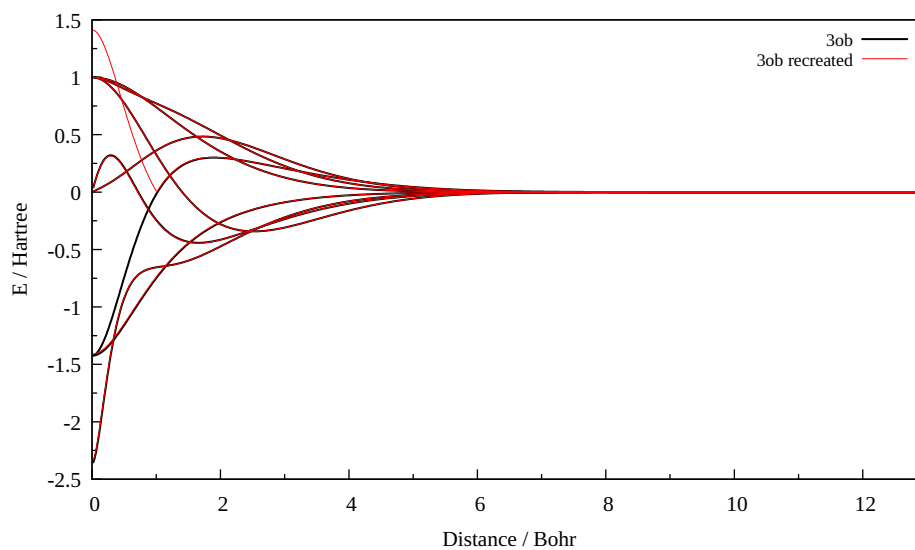

Figure S1: Comparison of the C-C Slater-Koster tables of original 3ob parametrization (black) and recreated one with Hotcent (red)

Table S1: Hubbard derivatives of Alkali metals from the original 3ob set<sup>[2]</sup> and recalculated with Hotcent

| Metal atom | 3ob     | Hotcent |
|------------|---------|---------|
| Na         | -0.0454 | -0.0455 |
| K          | -0.0339 | -0.0339 |

## S2 Geometry optimisation benchmark of reference molecules

Table S2: Geometrical parameters of the molecular minimum structures

| Molecule                    | MP2/cc-pVTZ | DFTB  |
|-----------------------------|-------------|-------|
| Methylithium ( $d_{C-Li}$ ) | 1.985       | 1.995 |
| Coronene ( $d_{plane-Li}$ ) | 2.618       | 2.697 |

## S3 Depiction of the scan configurations for the DFTB force field parametrisation

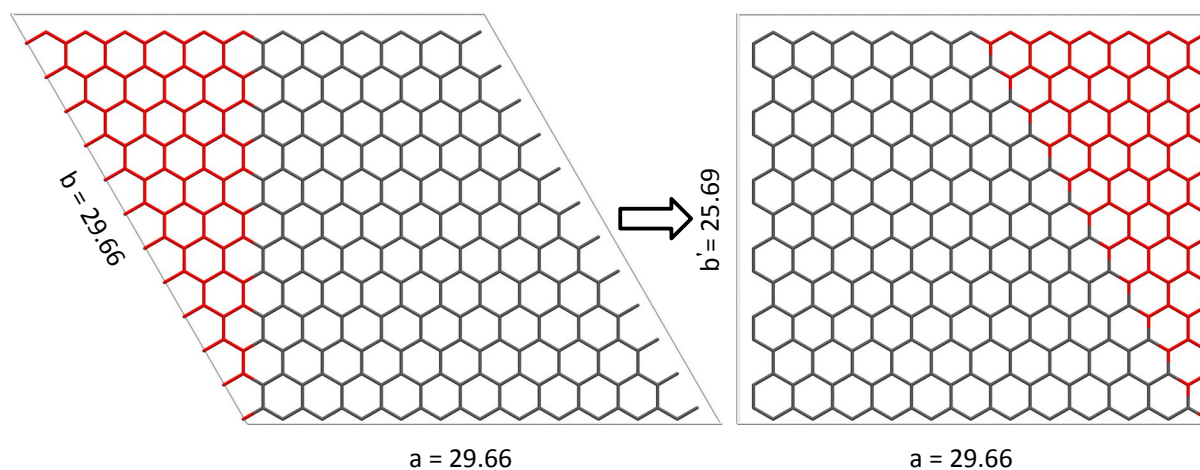

Figure S2: Orthorhombisation of the  $12 \times 12$  graphene super cell, the carbon atoms coloured in red were shifted by  $a$  in x direction accordingly. The orthorhombisation is valid if the number of unit cells along the  $b$ -direction is even (twelve in this case).

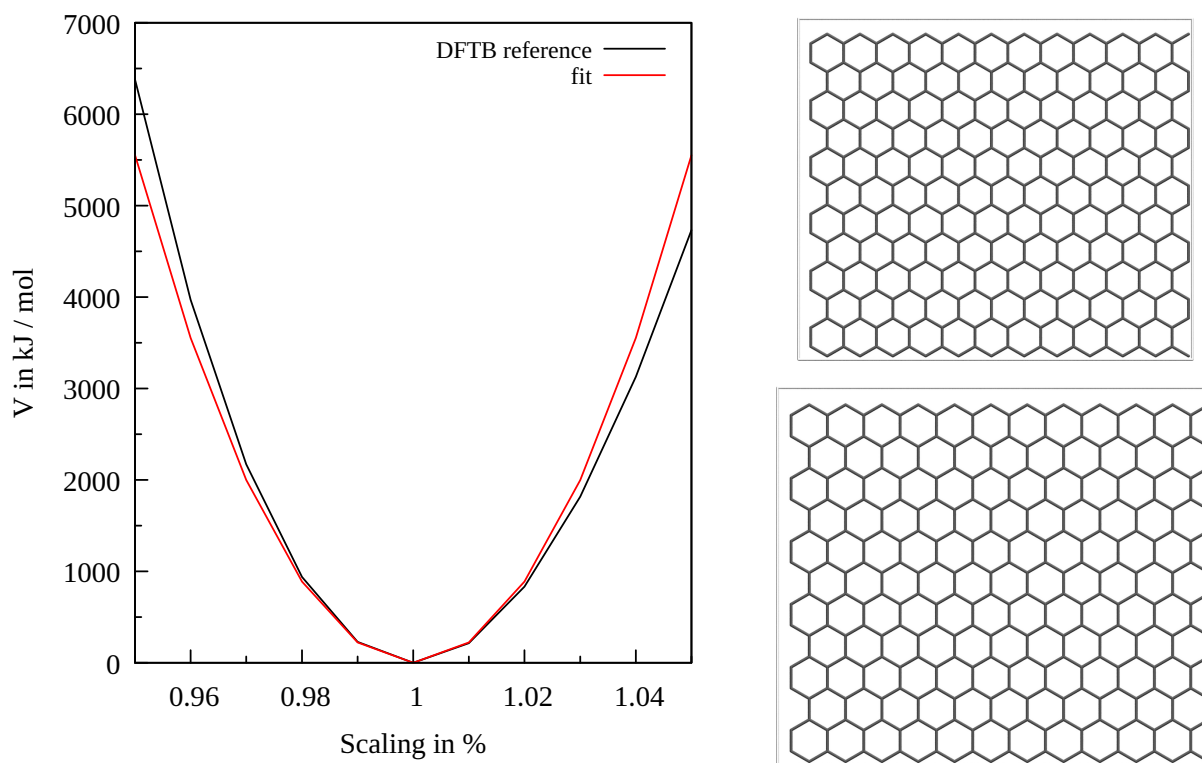

Figure S3: Visualisation of the bond potential of the force field and DFTB reference (left) and the associated scaled unit cell to 95% (upper right) and 105% (lower right)

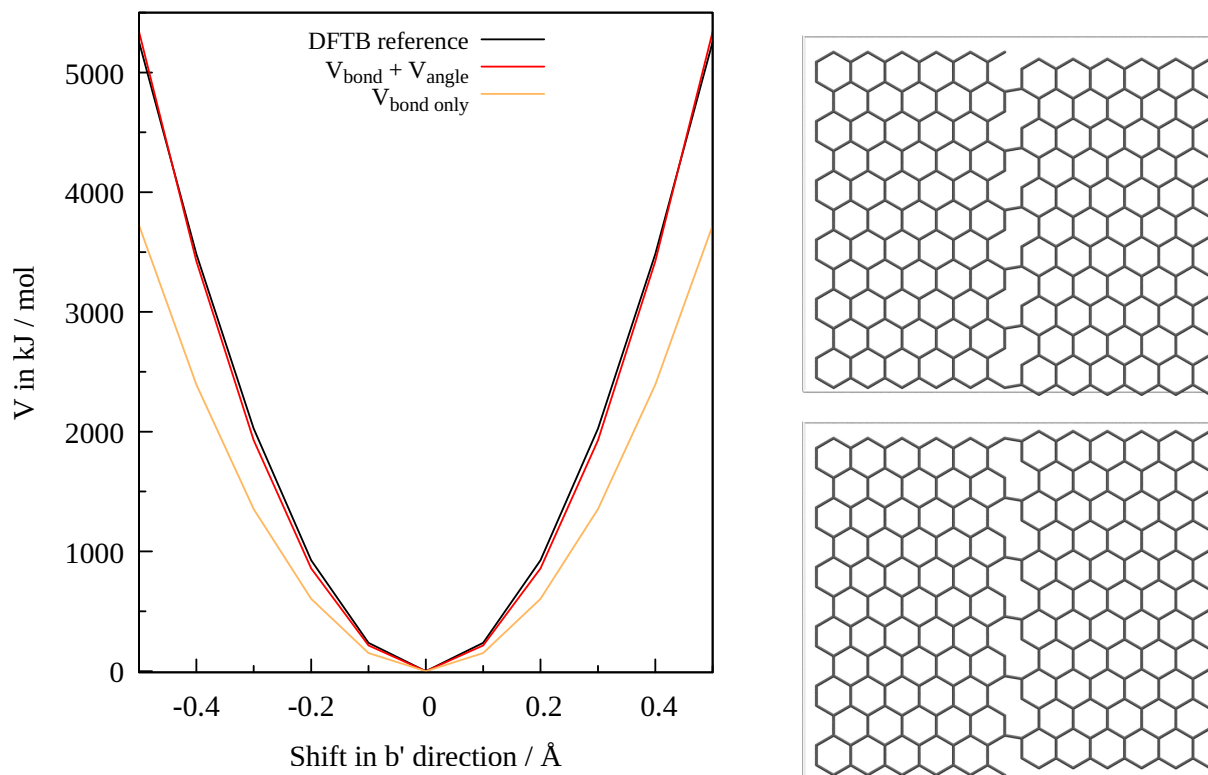

Figure S4: Visualisation of the angle potential of the force field and DFTB reference (left) and the associated shift of 0.5 and -0.5 Å in  $b'$  direction (right)

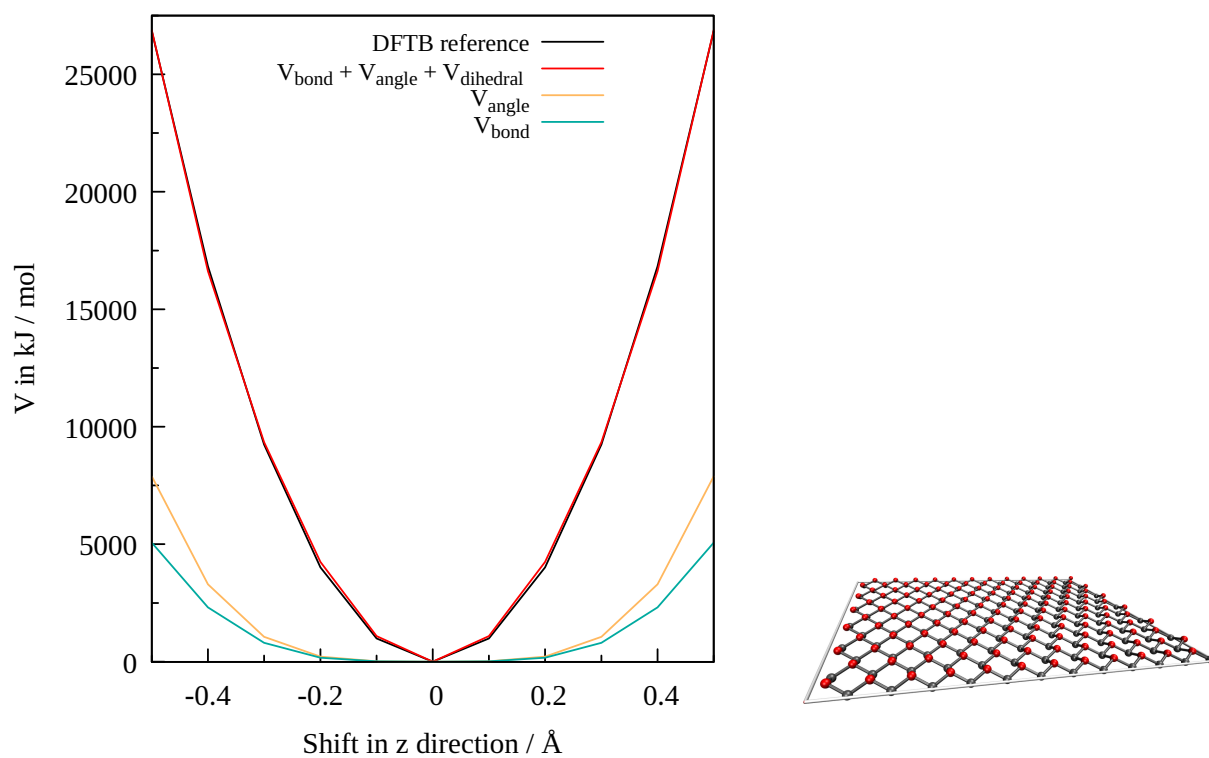

Figure S5: Visualisation of the dihedral potential of the force field and DFTB reference (left) and the associated shift of 0.5 and -0.5 Å in  $z$  direction (right)

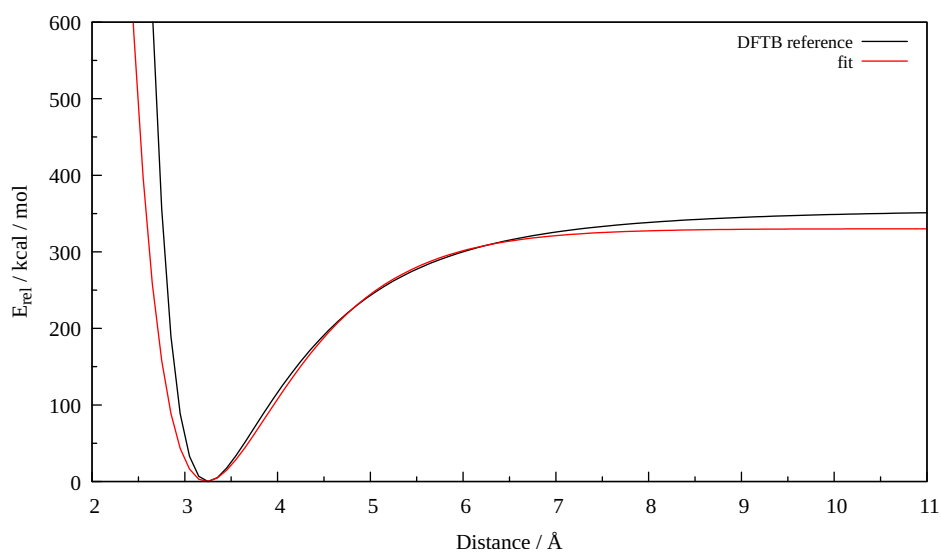

Figure S6: Energy plot of DFTB graphene interlayer scan and parametrised Morse potential

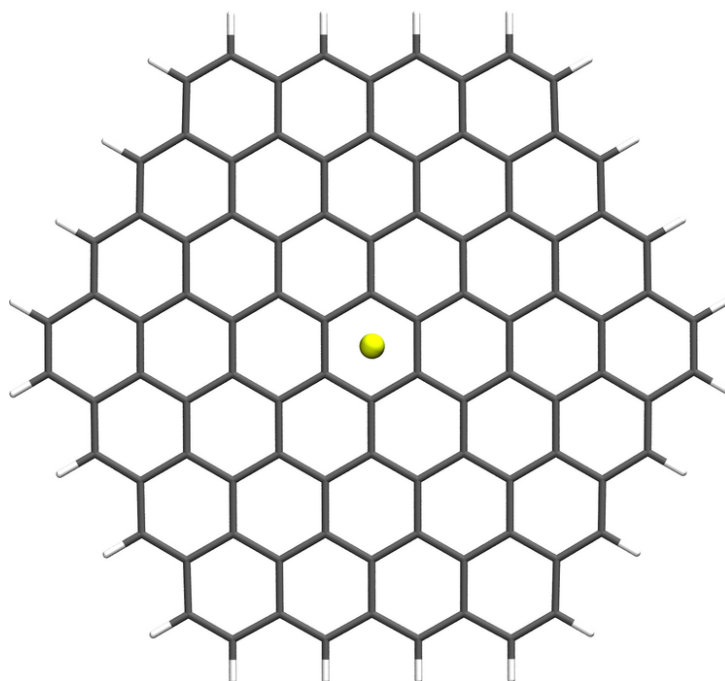

Figure S7: Visualisation of the graphene flake and adsorbed metal (Li/Na) atom employed in the scan with the composition  $C_{96}H_{24}$

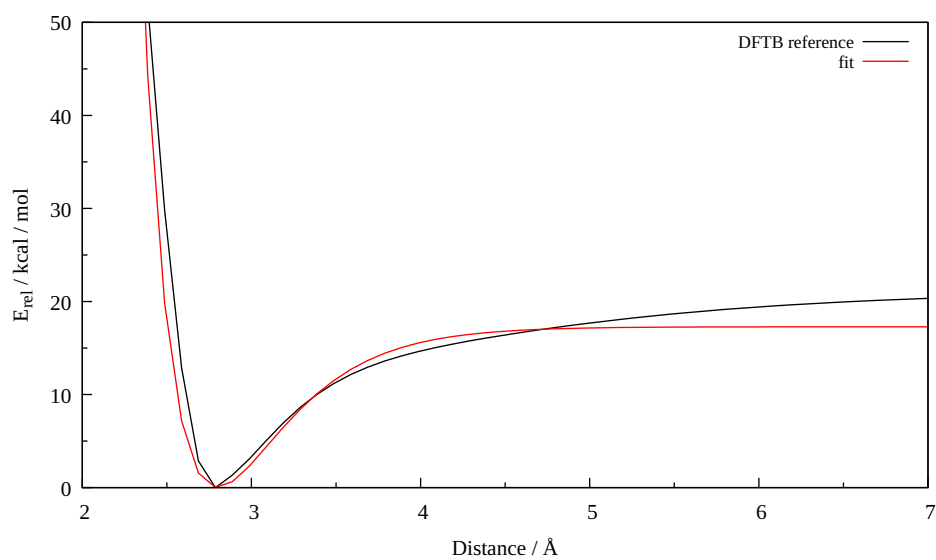

Figure S8: Energy plot of DFTB coronene and  $Li^0$  scan and parametrised Morse potential

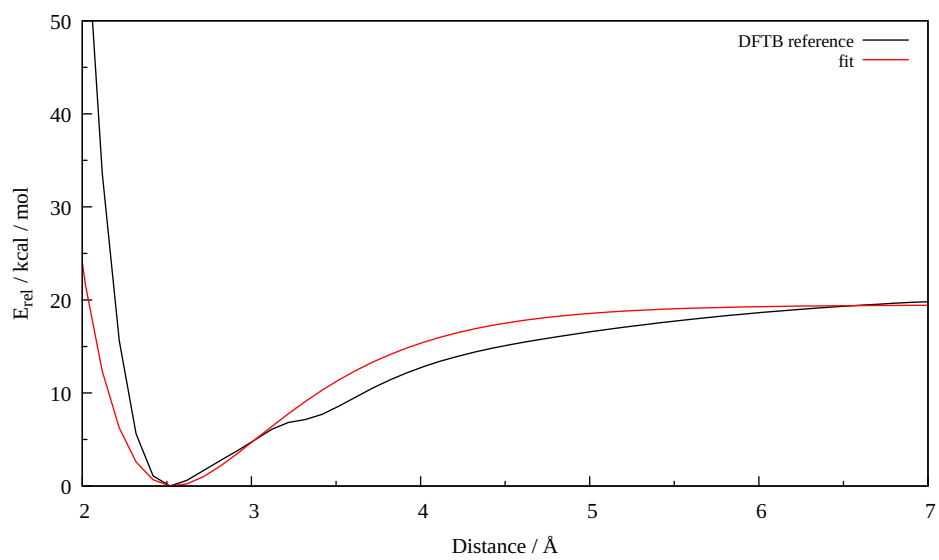

Figure S9: Energy plot of DFTB coronene and  $\text{Na}^0$  scan and parametrised Morse potential



Table S3: Average charges of the alkali metal atoms in elementary charge  $e$  in dependence of the temperature over the simulation time

| Metal | $N_{Atoms}$ | Temperature / K | Charge / $e$ |
|-------|-------------|-----------------|--------------|
| Li    | 1           | 273             | 0.5398       |
|       |             | 298             | 0.5310       |
|       |             | 323             | 0.5392       |
| Li    | 2           | 273             | 0.5243       |
|       |             | 298             | 0.5248       |
|       |             | 323             | 0.5265       |
| Li    | 4           | 273             | 0.5584       |
|       |             | 298             | 0.5547       |
|       |             | 323             | 0.5607       |
| Na    | 1           | 273             | 0.6589       |
|       |             | 298             | 0.6579       |
|       |             | 323             | 0.6576       |
| Na    | 2           | 273             | 0.6532       |
|       |             | 298             | 0.6213       |
|       |             | 323             | 0.6542       |
| Na    | 4           | 273             | 0.6305       |
|       |             | 298             | 0.6378       |
|       |             | 323             | 0.6010       |

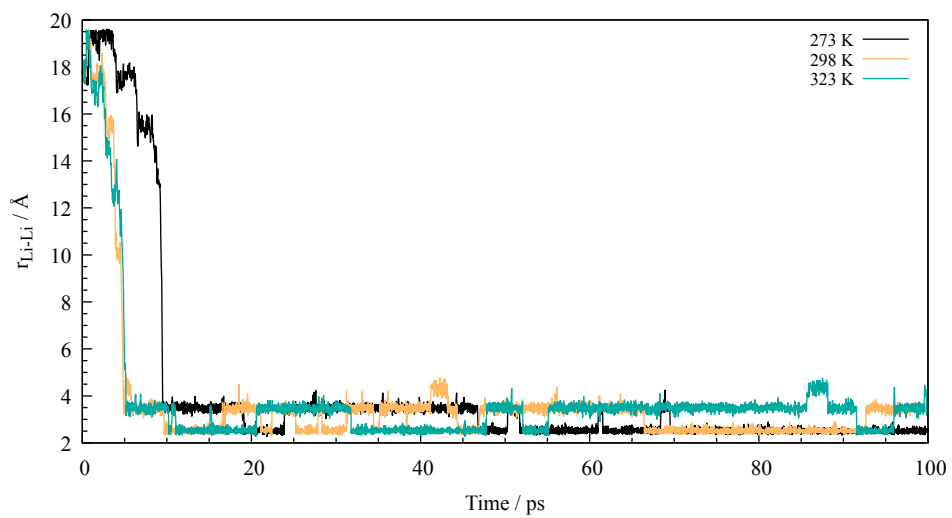

Figure S10: Distance between the two intercalated Li atoms at different temperatures (273 K, 298 K and 323 K) over the simulation time

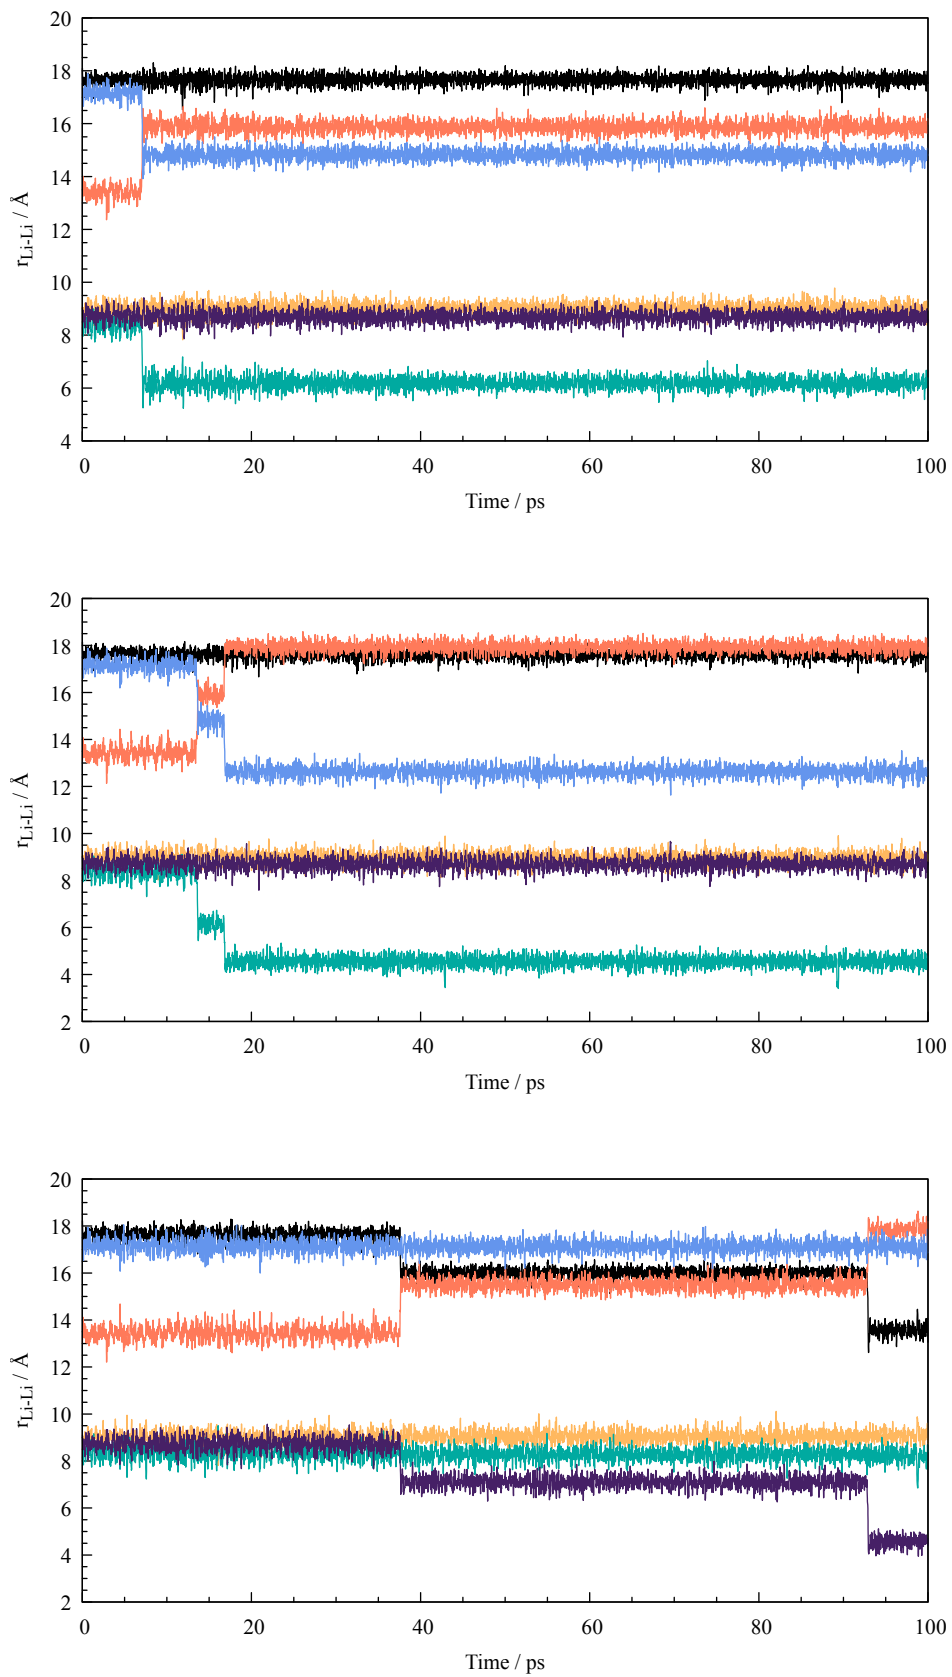

Figure S11: Distance between the Li atom pairs at 273 K (top), 298 K (center) and 323 K (bottom) of the simulations with four intercalated atoms

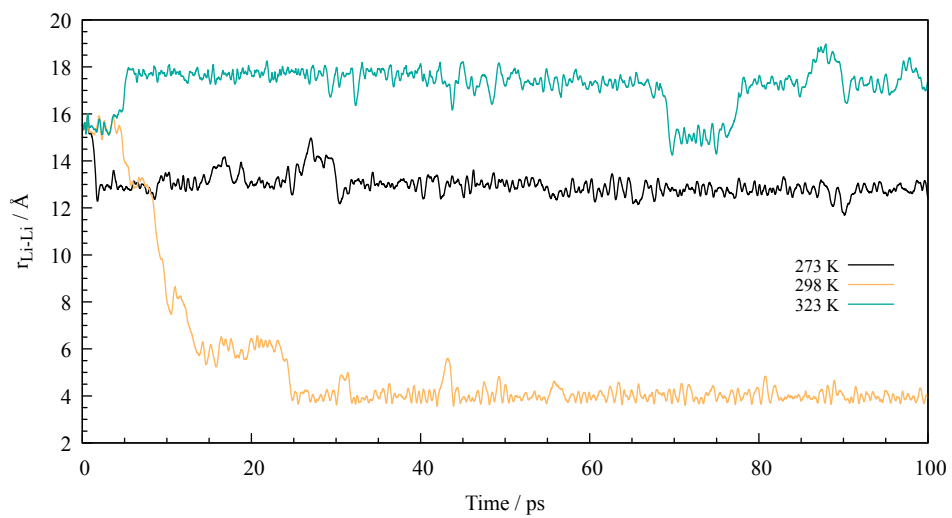

Figure S12: Distance between the two intercalated Na atoms at different temperatures (273 K, 298 K and 323 K) over the simulation time

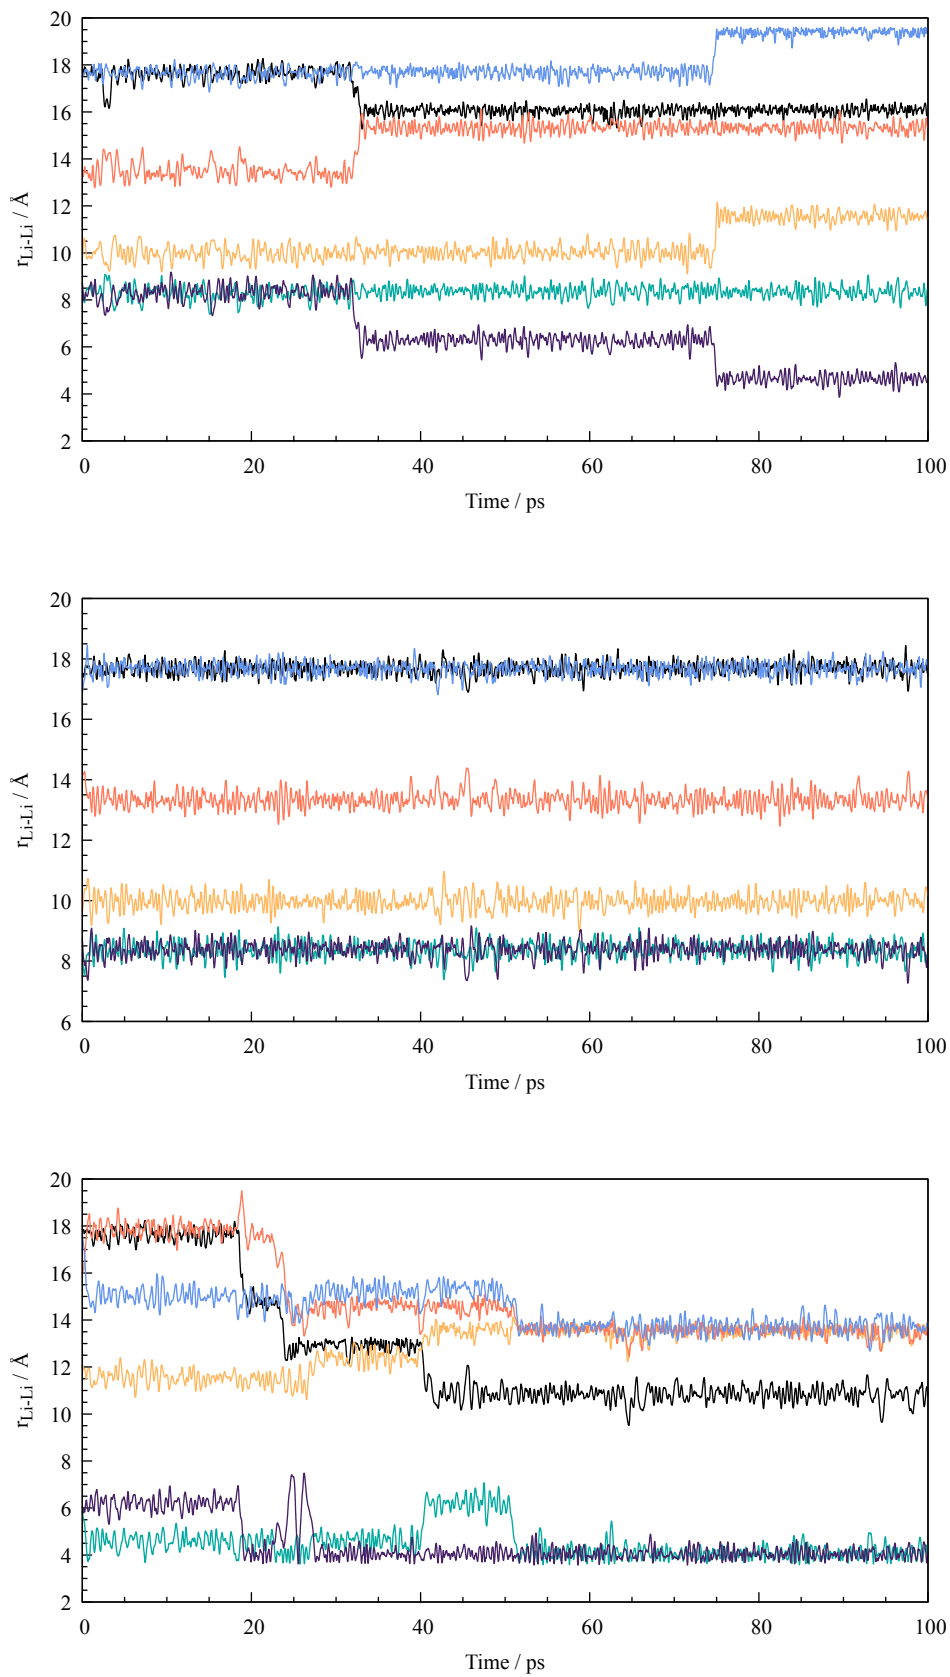

Figure S13: Distance between the Na atom pairs at 273 K (top), 298 K (center) and 323 K (bottom) of the simulations with four intercalated atoms

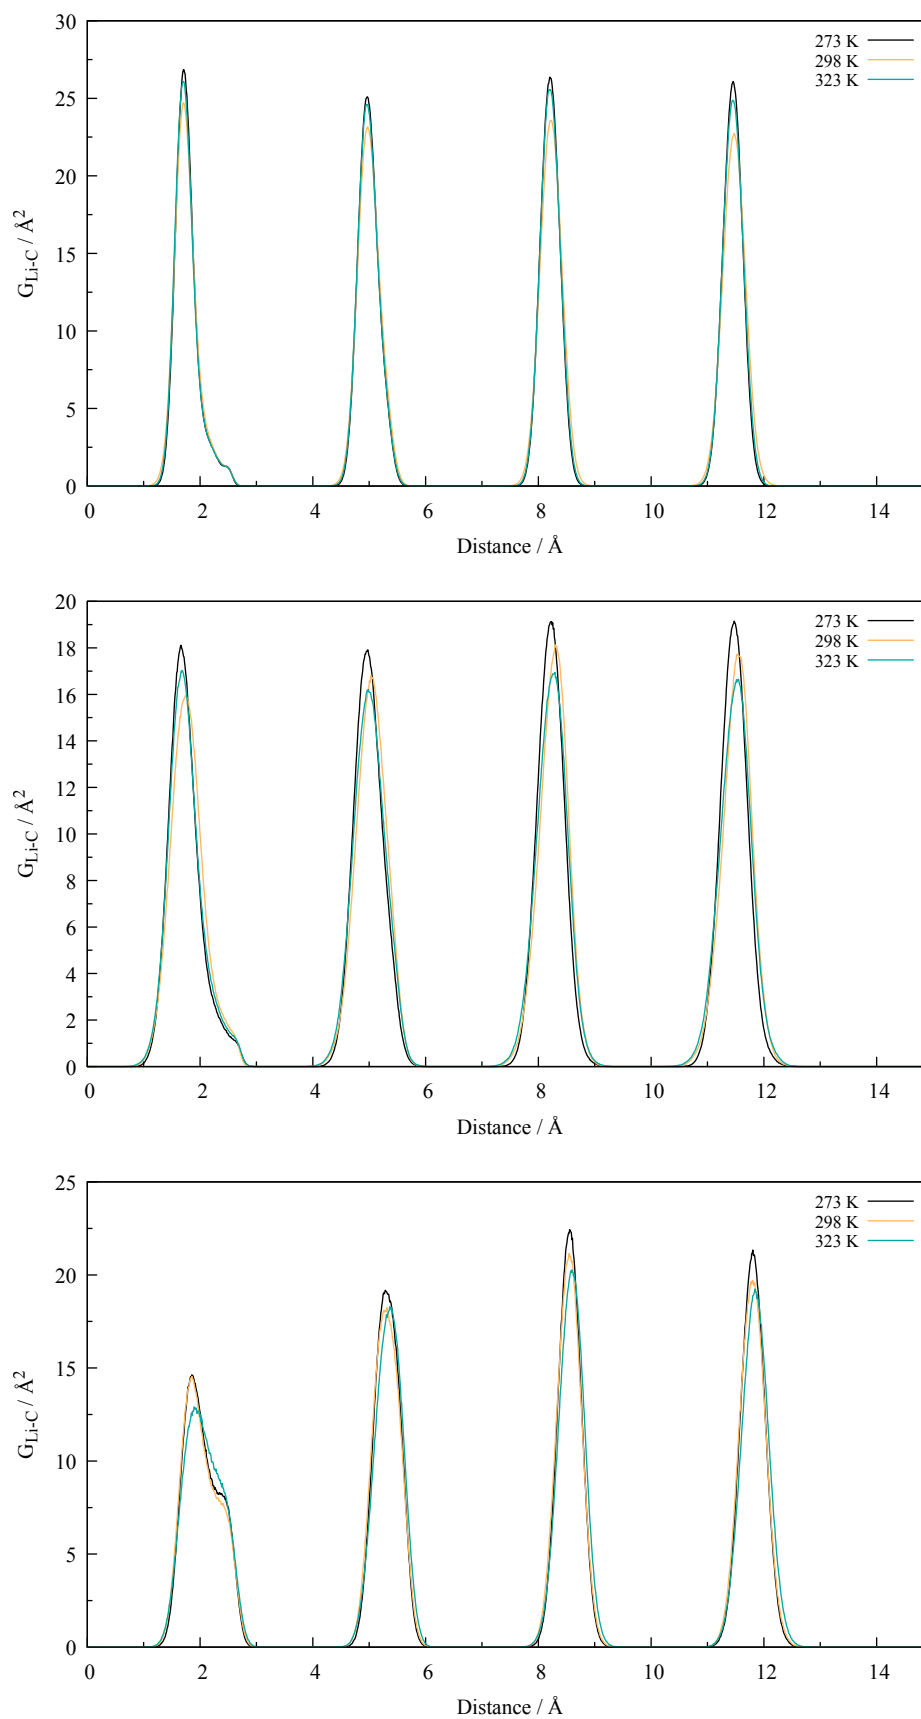

Figure S14: z-distribution functions of Li-C calculated from the simulation trajectories of the intercalation of one (top), two (center) and four (bottom) lithium atoms

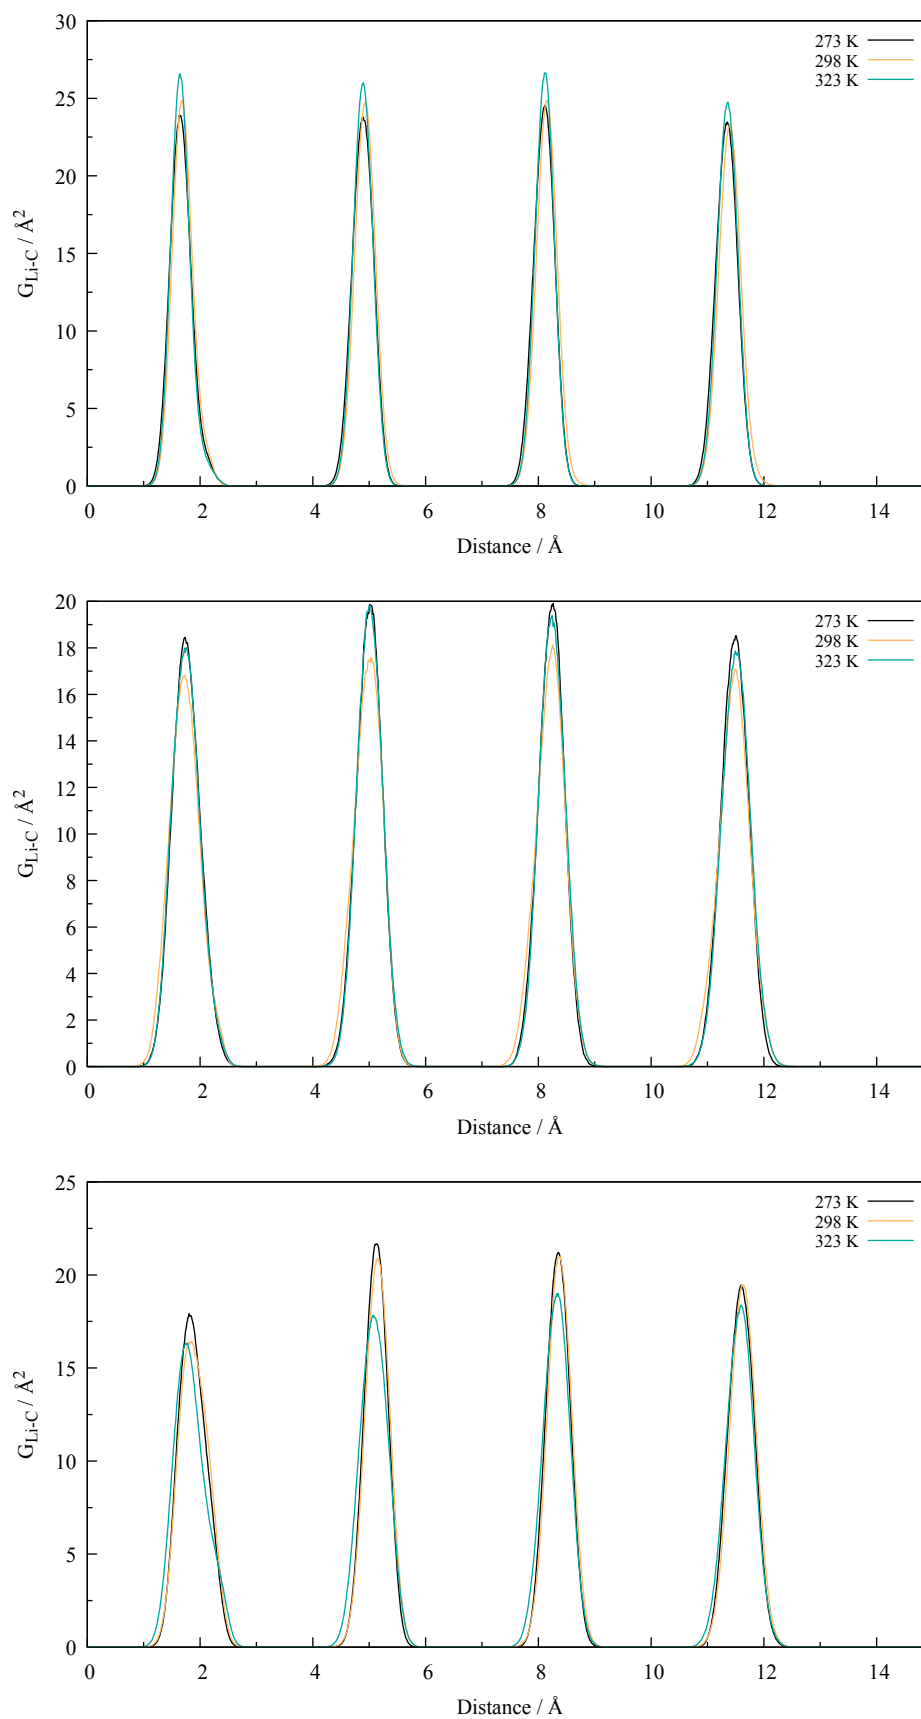

Figure S15:  $z$ -distribution functions of Na-C calculated from the simulation trajectories of the intercalation of one (top), two (center) and four (bottom) sodium atoms

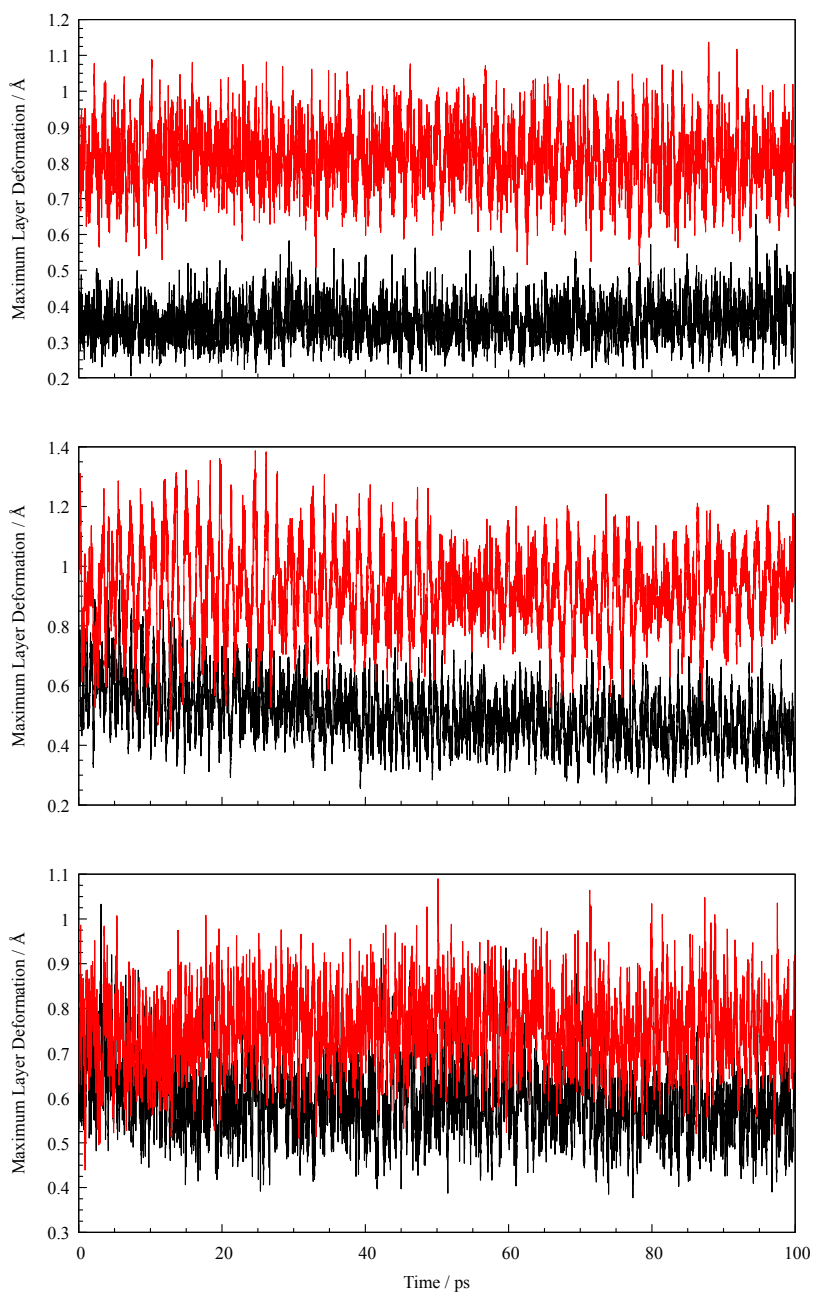

Figure S16: Maximum graphene plane deformations over time of the individual QM layers (black and red) intercalating one (top), two (center) and four (bottom) lithium atoms



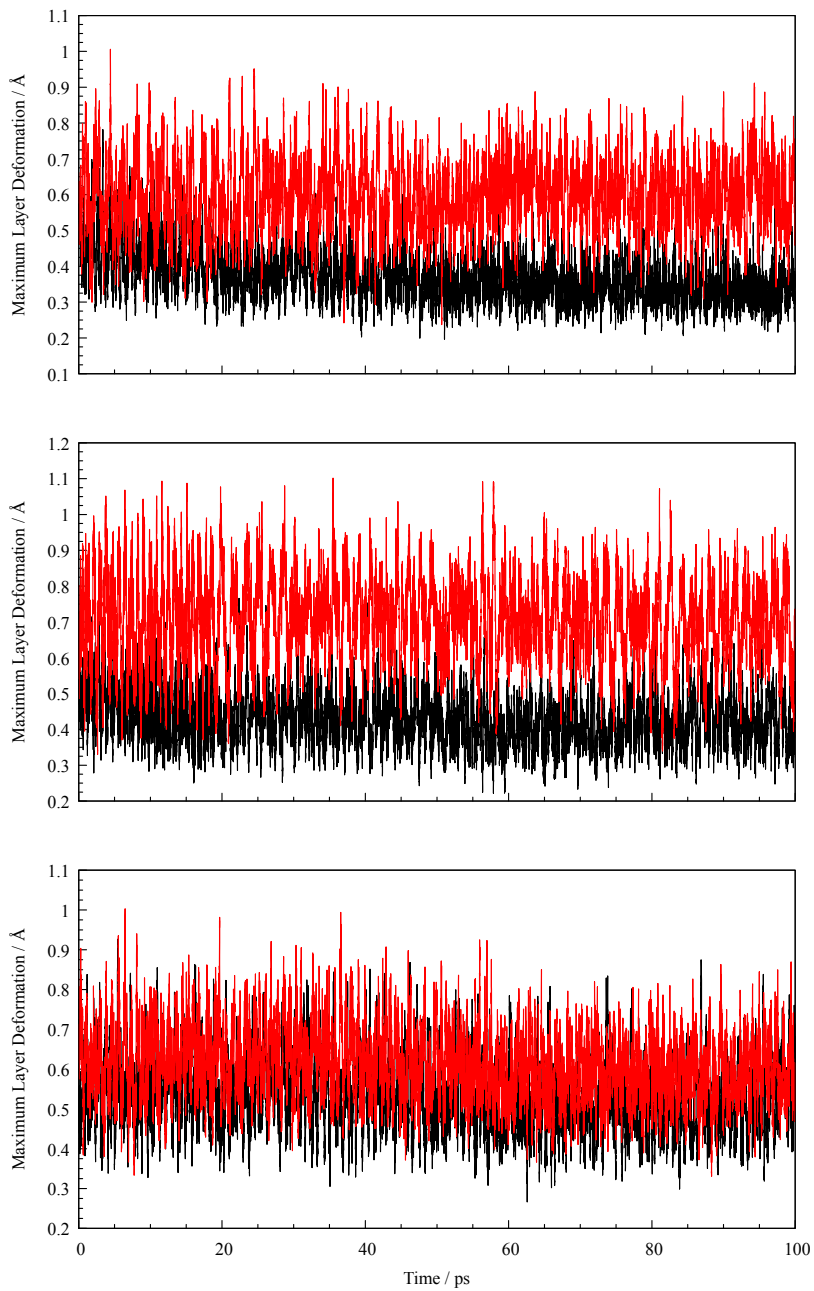

Figure S17: Maximum graphene plane deformations over time of the individual QM layers (black and red) intercalating one (top), two (center) and four (bottom) sodium atoms

Listing 1: MP2/cc-pVTZ optimised Methyllithium

|    |           |           |           |
|----|-----------|-----------|-----------|
| 5  |           |           |           |
| C  | 0.000000  | 0.000000  | 0.390478  |
| Li | 0.000000  | 0.000000  | -1.594781 |
| H  | 0.000000  | 1.009875  | 0.813825  |
| H  | -0.874578 | -0.504938 | 0.813825  |
| H  | 0.874578  | -0.504938 | 0.813825  |

Listing 2: DFTB optimised Methyllithium

|    |             |             |             |
|----|-------------|-------------|-------------|
| 5  |             |             |             |
| C  | -0.00000000 | 0.00001336  | 0.46522519  |
| Li | 0.00000000  | -0.00000013 | -1.52957324 |
| H  | 0.00000000  | 1.03582104  | 0.76647492  |
| H  | -0.89705715 | -0.51791663 | 0.76647856  |
| H  | 0.89705715  | -0.51791663 | 0.76647856  |

Listing 3: MP2 optimised Li in contact with coronene

|    |           |           |           |
|----|-----------|-----------|-----------|
| 37 |           |           |           |
| C  | 3.525541  | 1.240886  | -0.044435 |
| C  | 2.843516  | -0.000412 | -0.049309 |
| C  | 3.525181  | -1.241907 | -0.044435 |
| C  | 2.837520  | -2.432554 | -0.044200 |
| C  | 1.421552  | -2.462586 | -0.052418 |
| C  | 0.687195  | -3.673615 | -0.044352 |
| C  | 2.838224  | 2.431732  | -0.044200 |
| C  | 1.422265  | 2.462174  | -0.052418 |
| C  | 0.710937  | 1.230479  | -0.057826 |
| C  | 1.421283  | -0.000206 | -0.066198 |
| C  | 0.710581  | -1.230684 | -0.057826 |
| C  | -0.710419 | -1.230552 | -0.066506 |
| C  | -1.421749 | -2.462159 | -0.049725 |
| C  | -0.687768 | -3.673455 | -0.044763 |

|    |           |           |           |
|----|-----------|-----------|-----------|
| C  | 0.688259  | 3.673416  | -0.044352 |
| C  | -0.686704 | 3.673654  | -0.044763 |
| C  | -1.421036 | 2.462571  | -0.049725 |
| C  | -0.710063 | 1.230758  | -0.066506 |
| C  | -1.420737 | 0.000206  | -0.058193 |
| C  | -2.843111 | 0.000412  | -0.053063 |
| C  | -3.525060 | -1.240881 | -0.045038 |
| C  | -2.837747 | -2.431735 | -0.045146 |
| C  | -2.837043 | 2.432556  | -0.045146 |
| C  | -3.524701 | 1.241902  | -0.045038 |
| H  | 4.608396  | -1.240707 | -0.033292 |
| H  | 3.377850  | -3.371422 | -0.036566 |
| H  | 4.608755  | 1.239373  | -0.033292 |
| H  | 1.229843  | -4.611146 | -0.036675 |
| H  | 3.378826  | 3.370444  | -0.036566 |
| H  | -1.230684 | -4.610789 | -0.033690 |
| H  | 1.231178  | 4.610790  | -0.036675 |
| H  | -3.378316 | -3.370426 | -0.034079 |
| H  | -1.229349 | 4.611145  | -0.033690 |
| H  | -3.377340 | 3.371404  | -0.034079 |
| H  | -4.607950 | 1.240737  | -0.037615 |
| H  | -4.608309 | -1.239402 | -0.037615 |
| Li | -0.012795 | 0.000002  | 2.572445  |

Listing 4: DFTB optimised Li in contact with coronene

37

|   |             |             |            |
|---|-------------|-------------|------------|
| C | -3.68624267 | -0.68967426 | 0.06740591 |
| C | -3.68652238 | 0.68911036  | 0.06162971 |
| C | -1.24118305 | -3.54511156 | 0.08454014 |
| C | -2.43530343 | -2.85587827 | 0.07843183 |
| C | -2.46641304 | -1.42951225 | 0.07034154 |
| C | -1.23177782 | -0.71646815 | 0.06745921 |
| C | -1.23198051 | 0.71662313  | 0.06156515 |
| C | -2.46682478 | 1.42935164  | 0.05884120 |

|    |             |             |            |
|----|-------------|-------------|------------|
| C  | -2.43593361 | 2.85569231  | 0.05620321 |
| C  | -1.24186421 | 3.54521711  | 0.05613742 |
| C  | 1.26024894  | -3.54476135 | 0.09061372 |
| C  | 0.00955462  | -2.85855344 | 0.08235733 |
| C  | 0.00940856  | -1.43284282 | 0.07354166 |
| C  | 1.25046775  | -0.71618149 | 0.07373154 |
| C  | 1.25026998  | 0.71692130  | 0.06776605 |
| C  | 0.00907304  | 1.43333439  | 0.06166346 |
| C  | 0.00894492  | 2.85909265  | 0.05884477 |
| C  | 1.25974661  | 3.54560420  | 0.06146921 |
| C  | 2.45434438  | -2.85524058 | 0.09081310 |
| C  | 2.48519335  | -1.42893337 | 0.08264030 |
| C  | 3.70495218  | -0.68880160 | 0.08509471 |
| C  | 3.70475548  | 0.69002234  | 0.07895659 |
| C  | 2.48496870  | 1.42988136  | 0.07066501 |
| C  | 2.45381567  | 2.85629533  | 0.06745710 |
| H  | -3.37721852 | -3.40057054 | 0.07823304 |
| H  | -4.62876919 | -1.23327476 | 0.06877598 |
| H  | -4.62931705 | 1.23222594  | 0.05776767 |
| H  | -3.37782405 | 3.40039278  | 0.05306136 |
| H  | -1.24172699 | -4.63317750 | 0.08992593 |
| H  | -1.24279068 | 4.63326274  | 0.05293052 |
| H  | 1.26090193  | -4.63282265 | 0.09532466 |
| H  | 1.26043800  | 4.63368302  | 0.05733461 |
| H  | 3.39629499  | -3.39980648 | 0.09567538 |
| H  | 4.64764795  | -1.23208425 | 0.09054409 |
| H  | 4.64731840  | 1.23357738  | 0.07882272 |
| H  | 3.39570160  | 3.40106528  | 0.06866506 |
| Li | 0.00249405  | 0.01146193  | 2.76925922 |

Listing 5: DFTB optimised Li in contact with a graphene flake with composition  $C_{96}H_{24}$

121

|   |             |             |            |            |
|---|-------------|-------------|------------|------------|
| C | -3.73656159 | -0.60807528 | 0.22260823 | 4.00723830 |
| C | -3.74100305 | 0.81712682  | 0.20999253 | 4.00724321 |

|    |             |             |            |            |
|----|-------------|-------------|------------|------------|
| C  | -1.25561024 | -3.45733218 | 0.21820375 | 4.00723980 |
| C  | -2.49204919 | -2.74842842 | 0.22642565 | 4.00723264 |
| C  | -2.50052739 | -1.32137974 | 0.22204905 | 4.01367433 |
| C  | -1.26737034 | -0.60441110 | 0.20564162 | 4.01570273 |
| C  | -1.27184253 | 0.82848681  | 0.19256445 | 4.01570735 |
| C  | -2.50943372 | 1.53797208  | 0.19654057 | 4.01368327 |
| C  | -2.50982916 | 2.96490018  | 0.17567570 | 4.00725016 |
| C  | -1.27782470 | 3.68118428  | 0.15354696 | 4.00725506 |
| C  | 1.22008487  | -3.44992606 | 0.18905763 | 4.00725217 |
| C  | -0.01987430 | -2.74365086 | 0.20511678 | 4.01367748 |
| C  | -0.02425450 | -1.31715109 | 0.19687557 | 4.01570063 |
| C  | 1.21440638  | -0.59700193 | 0.17455351 | 4.01569999 |
| C  | 1.20992201  | 0.83588834  | 0.16065765 | 4.01569756 |
| C  | -0.03318606 | 1.54863320  | 0.16996144 | 4.01569939 |
| C  | -0.03769009 | 2.97504085  | 0.15169220 | 4.01367834 |
| C  | 1.19782145  | 3.68855490  | 0.12064341 | 4.00724563 |
| C  | 2.45209728  | -2.73364152 | 0.16741597 | 4.00725623 |
| C  | 2.45188121  | -1.30657609 | 0.16116576 | 4.01368932 |
| C  | 3.68323048  | -0.58589341 | 0.13030298 | 4.00724760 |
| C  | 3.67875502  | 0.83928581  | 0.11547424 | 4.00723573 |
| C  | 2.44292737  | 1.55274445  | 0.13241185 | 4.01366903 |
| C  | 2.43423568  | 2.97963147  | 0.11069045 | 4.00723498 |
| Li | 0.00490745  | 0.14076015  | 2.83578697 | 0.48421568 |
| C  | 4.91372007  | 1.55912895  | 0.07544552 | 4.00109546 |
| C  | 3.67083376  | 3.69668911  | 0.07109093 | 4.00109669 |
| C  | 1.19155524  | 5.11824657  | 0.09149538 | 4.00109961 |
| C  | -1.28085839 | 5.11089132  | 0.12450415 | 4.00110334 |
| C  | -3.75129876 | 3.67456327  | 0.16796160 | 4.00110101 |
| C  | -4.98086869 | 1.52957792  | 0.20147943 | 4.00109772 |
| C  | -4.97197370 | -1.32825443 | 0.22720207 | 4.00109884 |
| C  | -3.72908465 | -3.46581455 | 0.23080065 | 4.00109479 |
| C  | -1.24974821 | -4.88731850 | 0.21474071 | 4.00109776 |
| C  | 1.22271953  | -4.87992468 | 0.18604947 | 4.00110133 |
| C  | 3.69317721  | -3.44361085 | 0.14301135 | 4.00110535 |
| C  | 4.90647555  | 2.98499226  | 0.05315641 | 3.99788115 |

|   |             |             |             |            |
|---|-------------|-------------|-------------|------------|
| C | 2.42572310  | 5.83046514  | 0.05269431  | 3.99890912 |
| C | 3.66162078  | 5.12182519  | 0.04236791  | 3.99890307 |
| C | -0.04695559 | 5.82516291  | 0.09378419  | 3.99788854 |
| C | -2.51984280 | 5.81574407  | 0.11818831  | 3.99891150 |
| C | -3.75134551 | 5.09973521  | 0.13938457  | 3.99890506 |
| C | -4.98272329 | 2.95547797  | 0.18034621  | 3.99788346 |
| C | -6.21084990 | 0.80911663  | 0.20577754  | 3.99890345 |
| C | -6.20641318 | -0.61549253 | 0.21899064  | 3.99890470 |
| C | -4.96495274 | -2.75428723 | 0.23123009  | 3.99788305 |
| C | -3.72026907 | -4.89123700 | 0.22679595  | 3.99889970 |
| C | -2.48433911 | -5.59984772 | 0.21904171  | 3.99890537 |
| C | -0.01140540 | -5.59435508 | 0.19890133  | 3.99788625 |
| C | 2.46132053  | -5.58505638 | 0.16157843  | 3.99890863 |
| C | 3.69283178  | -4.86906639 | 0.14026702  | 3.99890526 |
| C | 4.92270333  | -1.29865965 | 0.10589476  | 4.00110404 |
| C | 4.92439451  | -2.72470003 | 0.11271912  | 3.99789134 |
| C | 6.14775580  | 0.84605303  | 0.05063395  | 3.99890375 |
| C | 6.15224897  | -0.57853345 | 0.06625271  | 3.99890669 |
| C | 4.90765437  | 5.83539839  | -0.00291170 | 3.95137636 |
| C | 2.41161251  | 7.26657952  | 0.01792955  | 3.95137031 |
| C | -0.05170679 | 7.26048524  | 0.05791153  | 3.94949649 |
| C | -2.51521280 | 7.25191675  | 0.08317627  | 3.95137200 |
| C | -5.00236952 | 5.80583437  | 0.12504801  | 3.95137649 |
| C | -6.22839136 | 3.66927244  | 0.16377258  | 3.94949932 |
| C | -7.45255058 | 1.53144479  | 0.18936477  | 3.95137071 |
| C | -7.44360427 | -1.34570130 | 0.21713435  | 3.95137374 |
| C | -6.20616242 | -3.47599053 | 0.22858350  | 3.94950174 |
| C | -4.96688006 | -5.60523579 | 0.22436251  | 3.95137394 |
| C | -2.47077764 | -7.03635471 | 0.20924729  | 3.95136967 |
| C | -0.00722802 | -7.03009006 | 0.18869100  | 3.94949757 |
| C | 2.45612219  | -7.02161755 | 0.15151253  | 3.95137192 |
| C | 4.94329488  | -5.57559442 | 0.10856202  | 3.95137362 |
| C | 6.16950889  | -3.43896309 | 0.08130512  | 3.94950176 |
| C | 7.39341463  | -1.30132017 | 0.03568917  | 3.95137163 |
| C | 7.38432392  | 1.57579427  | 0.00348027  | 3.95137269 |

|   |             |             |             |            |
|---|-------------|-------------|-------------|------------|
| C | 6.14706756  | 3.70623302  | 0.00618273  | 3.94950053 |
| C | 3.67794915  | 7.95602139  | -0.02365937 | 4.10700600 |
| C | 4.86251171  | 7.27681939  | -0.03347391 | 4.10700301 |
| C | 1.18963764  | 7.94933291  | 0.02210670  | 4.15259211 |
| C | -1.29763877 | 7.94193711  | 0.05533847  | 4.15259237 |
| C | -6.20457513 | 5.08894858  | 0.13787868  | 4.15257606 |
| C | -7.42387641 | -2.74532443 | 0.22352678  | 4.15257722 |
| C | -6.17351672 | -4.89572360 | 0.22644106  | 4.15257504 |
| C | -1.24892047 | -7.71919675 | 0.19599938  | 4.15258932 |
| C | 1.23839211  | -7.71175452 | 0.16665320  | 4.15258695 |
| C | 3.72669926  | -7.70381936 | 0.12144779  | 4.10700016 |
| C | 4.90705469  | -7.01757193 | 0.10109973  | 4.10700227 |
| C | 6.14536918  | -4.85887041 | 0.08179864  | 4.15258562 |
| C | 7.38231014  | -2.70102281 | 0.04537406  | 4.15258723 |
| C | 8.61469884  | 0.82341214  | -0.02442221 | 4.10699702 |
| C | 8.61902680  | -0.54199233 | -0.00869987 | 4.10700415 |
| C | 7.36441014  | 2.97528541  | -0.01683170 | 4.15257378 |
| C | 6.11409863  | 5.12573683  | -0.01924714 | 4.15257862 |
| C | -4.96664254 | 7.24750167  | 0.09366020  | 4.10700232 |
| C | -3.78629366 | 7.93378654  | 0.07409077  | 4.10700672 |
| C | -7.44152994 | 2.93104019  | 0.16967670  | 4.15257323 |
| C | -8.67871137 | 0.77170513  | 0.19031902  | 4.10699802 |
| C | -8.67446745 | -0.59371698 | 0.20404277  | 4.10700003 |
| C | -4.92219555 | -7.04697209 | 0.21650259  | 4.10699767 |
| C | -3.73760426 | -7.72614945 | 0.20963575  | 4.10700278 |
| H | 1.18719919  | 9.03757550  | -0.00861194 | 0.91732887 |
| H | -1.30249814 | 9.03017484  | 0.02472794  | 0.91732896 |
| H | -3.78887923 | 9.02186298  | 0.04803185  | 0.91906489 |
| H | -5.91142587 | 7.78775254  | 0.08315882  | 0.91906472 |
| H | -7.14848334 | 5.63117020  | 0.12183464  | 0.91732819 |
| H | -8.38663295 | 3.47114525  | 0.15264150  | 0.91732788 |
| H | -9.62247887 | 1.31367202  | 0.17717976  | 0.91906304 |
| H | -9.61485102 | -1.14168867 | 0.20208597  | 0.91906425 |
| H | -8.36561535 | -3.29151505 | 0.21825667  | 0.91733025 |
| H | -7.11404110 | -5.44399491 | 0.22049218  | 0.91732967 |

|   |             |             |             |            |
|---|-------------|-------------|-------------|------------|
| H | -5.86360604 | -7.59317132 | 0.21372582  | 0.91906426 |
| H | -3.73341678 | -8.81450157 | 0.20152178  | 0.91906440 |
| H | -1.24699821 | -8.80781704 | 0.18491871  | 0.91732963 |
| H | 1.24271760  | -8.80036255 | 0.15504752  | 0.91732921 |
| H | 3.72880782  | -8.79216839 | 0.11204088  | 0.91906307 |
| H | 5.85137189  | -7.55812949 | 0.07541258  | 0.91906310 |
| H | 7.08876270  | -5.40151194 | 0.05398231  | 0.91732879 |
| H | 8.32692383  | -3.24157081 | 0.01820423  | 0.91732920 |
| H | 9.56237241  | -1.08431738 | -0.03277101 | 0.91906390 |
| H | 9.55459107  | 1.37099847  | -0.06113896 | 0.91906320 |
| H | 8.30557801  | 3.52104106  | -0.05656456 | 0.91732917 |
| H | 7.05407889  | 5.67362264  | -0.05773881 | 0.91733005 |
| H | 5.80348536  | 7.82272452  | -0.06737917 | 0.91906537 |
| H | 3.67336017  | 9.04408593  | -0.04986287 | 0.91906504 |

Listing 6: DFTB optimised dual layer graphene

|     |            |             |            |            |
|-----|------------|-------------|------------|------------|
| 576 |            |             |            |            |
| C   | 2.31257874 | 0.26404189  | 2.34557151 | 4.00116479 |
| C   | 1.07700354 | 0.97740413  | 2.34646095 | 3.99883517 |
| C   | 1.07700355 | 2.40409541  | 2.34557862 | 4.00116483 |
| C   | 2.31257875 | 3.11745768  | 2.34646342 | 3.99883515 |
| C   | 2.31257876 | 4.54414900  | 2.34557654 | 4.00116483 |
| C   | 1.07700355 | 5.25751127  | 2.34646271 | 3.99883519 |
| C   | 1.07700354 | 6.68420260  | 2.34557852 | 4.00116480 |
| C   | 2.31257874 | 7.39756485  | 2.34646498 | 3.99883525 |
| C   | 2.31257870 | 8.82425614  | 2.34558308 | 4.00116477 |
| C   | 1.07700350 | 9.53761840  | 2.34647059 | 3.99883525 |
| C   | 1.07700349 | 10.96430968 | 2.34558442 | 4.00116477 |
| C   | 2.31257869 | 11.67767191 | 2.34646823 | 3.99883524 |
| C   | 2.31257871 | 13.10436317 | 2.34558053 | 4.00116480 |
| C   | 1.07700353 | 13.81772546 | 2.34646624 | 3.99883519 |
| C   | 1.07700358 | 15.24441676 | 2.34557899 | 4.00116483 |
| C   | 2.31257878 | 15.95777905 | 2.34646285 | 3.99883517 |
| C   | 2.31257883 | 17.38447039 | 2.34557676 | 4.00116483 |



|   |            |             |            |            |
|---|------------|-------------|------------|------------|
| C | 1.07700366 | 18.09783271 | 2.34646369 | 3.99883517 |
| C | 1.07700368 | 19.52452405 | 2.34557778 | 4.00116481 |
| C | 2.31257885 | 20.23788635 | 2.34646142 | 3.99883522 |
| C | 2.31257883 | 21.66457767 | 2.34557132 | 4.00116477 |
| C | 1.07700364 | 22.37793993 | 2.34645510 | 3.99883526 |
| C | 1.07700362 | 23.80463120 | 2.34556690 | 4.00116476 |
| C | 2.31257879 | 24.51799345 | 2.34645228 | 3.99883525 |
| C | 4.78372908 | 0.26404183  | 2.34557364 | 4.00116479 |
| C | 3.54815393 | 0.97740412  | 2.34646037 | 3.99883518 |
| C | 3.54815393 | 2.40409540  | 2.34557786 | 4.00116483 |
| C | 4.78372913 | 3.11745762  | 2.34646544 | 3.99883514 |
| C | 4.78372913 | 4.54414894  | 2.34557865 | 4.00116483 |
| C | 3.54815396 | 5.25751125  | 2.34646212 | 3.99883520 |
| C | 3.54815393 | 6.68420257  | 2.34557780 | 4.00116479 |
| C | 4.78372912 | 7.39756479  | 2.34646698 | 3.99883524 |
| C | 4.78372907 | 8.82425609  | 2.34558511 | 4.00116477 |
| C | 3.54815390 | 9.53761837  | 2.34647022 | 3.99883526 |
| C | 3.54815387 | 10.96430964 | 2.34558409 | 4.00116477 |
| C | 4.78372905 | 11.67767186 | 2.34647029 | 3.99883523 |
| C | 4.78372905 | 13.10436312 | 2.34558263 | 4.00116480 |
| C | 3.54815390 | 13.81772542 | 2.34646570 | 3.99883520 |
| C | 3.54815394 | 15.24441672 | 2.34557822 | 4.00116483 |
| C | 4.78372911 | 15.95777900 | 2.34646498 | 3.99883516 |
| C | 4.78372915 | 17.38447033 | 2.34557895 | 4.00116484 |
| C | 3.54815401 | 18.09783268 | 2.34646321 | 3.99883517 |
| C | 3.54815401 | 19.52452403 | 2.34557733 | 4.00116481 |
| C | 4.78372917 | 20.23788630 | 2.34646350 | 3.99883520 |
| C | 4.78372914 | 21.66457761 | 2.34557340 | 4.00116477 |
| C | 3.54815400 | 22.37793992 | 2.34645476 | 3.99883526 |
| C | 3.54815397 | 23.80463119 | 2.34556650 | 4.00116476 |
| C | 4.78372914 | 24.51799339 | 2.34645440 | 3.99883524 |
| C | 7.25487938 | 0.26404169  | 2.34557561 | 4.00116480 |
| C | 6.01930426 | 0.97740402  | 2.34646369 | 3.99883515 |
| C | 6.01930427 | 2.40409529  | 2.34558126 | 4.00116484 |
| C | 7.25487943 | 3.11745751  | 2.34646770 | 3.99883512 |

|   |            |             |            |            |
|---|------------|-------------|------------|------------|
| C | 7.25487943 | 4.54414882  | 2.34558076 | 4.00116484 |
| C | 6.01930430 | 5.25751117  | 2.34646551 | 3.99883517 |
| C | 6.01930427 | 6.68420248  | 2.34558118 | 4.00116480 |
| C | 7.25487942 | 7.39756473  | 2.34646919 | 3.99883522 |
| C | 7.25487938 | 8.82425603  | 2.34558693 | 4.00116478 |
| C | 6.01930424 | 9.53761832  | 2.34647329 | 3.99883523 |
| C | 6.01930420 | 10.96430958 | 2.34558713 | 4.00116478 |
| C | 7.25487934 | 11.67767183 | 2.34647201 | 3.99883521 |
| C | 7.25487934 | 13.10436309 | 2.34558450 | 4.00116481 |
| C | 6.01930421 | 13.81772538 | 2.34646900 | 3.99883517 |
| C | 6.01930424 | 15.24441667 | 2.34558174 | 4.00116484 |
| C | 7.25487939 | 15.95777897 | 2.34646745 | 3.99883514 |
| C | 7.25487943 | 17.38447028 | 2.34558109 | 4.00116485 |
| C | 6.01930430 | 18.09783262 | 2.34646657 | 3.99883515 |
| C | 6.01930430 | 19.52452396 | 2.34558053 | 4.00116482 |
| C | 7.25487945 | 20.23788622 | 2.34646526 | 3.99883519 |
| C | 7.25487943 | 21.66457751 | 2.34557501 | 4.00116478 |
| C | 6.01930430 | 22.37793983 | 2.34645782 | 3.99883524 |
| C | 6.01930427 | 23.80463108 | 2.34556964 | 4.00116476 |
| C | 7.25487943 | 24.51799327 | 2.34645631 | 3.99883522 |
| C | 9.72602963 | 0.26404160  | 2.34557325 | 4.00116479 |
| C | 8.49045453 | 0.97740390  | 2.34646306 | 3.99883516 |
| C | 8.49045454 | 2.40409517  | 2.34558083 | 4.00116483 |
| C | 9.72602966 | 3.11745744  | 2.34646546 | 3.99883514 |
| C | 9.72602967 | 4.54414875  | 2.34557849 | 4.00116483 |
| C | 8.49045456 | 5.25751109  | 2.34646497 | 3.99883518 |
| C | 8.49045454 | 6.68420241  | 2.34558084 | 4.00116480 |
| C | 9.72602964 | 7.39756471  | 2.34646703 | 3.99883524 |
| C | 9.72602960 | 8.82425601  | 2.34558448 | 4.00116477 |
| C | 8.49045449 | 9.53761829  | 2.34647231 | 3.99883524 |
| C | 8.49045446 | 10.96430956 | 2.34558615 | 4.00116478 |
| C | 9.72602956 | 11.67767185 | 2.34646945 | 3.99883523 |
| C | 9.72602958 | 13.10436310 | 2.34558209 | 4.00116480 |
| C | 8.49045447 | 13.81772538 | 2.34646842 | 3.99883518 |
| C | 8.49045451 | 15.24441666 | 2.34558157 | 4.00116483 |

|   |             |             |            |            |
|---|-------------|-------------|------------|------------|
| C | 9.72602963  | 15.95777897 | 2.34646548 | 3.99883516 |
| C | 9.72602968  | 17.38447027 | 2.34557887 | 4.00116484 |
| C | 8.49045456  | 18.09783258 | 2.34646582 | 3.99883515 |
| C | 8.49045457  | 19.52452390 | 2.34557962 | 4.00116481 |
| C | 9.72602971  | 20.23788617 | 2.34646262 | 3.99883521 |
| C | 9.72602969  | 21.66457745 | 2.34557230 | 4.00116477 |
| C | 8.49045457  | 22.37793973 | 2.34645678 | 3.99883524 |
| C | 8.49045455  | 23.80463097 | 2.34556888 | 4.00116476 |
| C | 9.72602968  | 24.51799318 | 2.34645397 | 3.99883524 |
| C | 12.19717987 | 0.26404163  | 2.34557406 | 4.00116479 |
| C | 10.96160475 | 0.97740387  | 2.34646153 | 3.99883517 |
| C | 10.96160476 | 2.40409514  | 2.34557932 | 4.00116483 |
| C | 12.19717986 | 3.11745747  | 2.34646617 | 3.99883514 |
| C | 12.19717987 | 4.54414878  | 2.34557928 | 4.00116483 |
| C | 10.96160476 | 5.25751108  | 2.34646353 | 3.99883519 |
| C | 10.96160474 | 6.68420240  | 2.34557939 | 4.00116479 |
| C | 12.19717983 | 7.39756474  | 2.34646764 | 3.99883524 |
| C | 12.19717980 | 8.82425604  | 2.34558520 | 4.00116477 |
| C | 10.96160469 | 9.53761831  | 2.34647069 | 3.99883525 |
| C | 10.96160467 | 10.96430958 | 2.34558452 | 4.00116477 |
| C | 12.19717978 | 11.67767188 | 2.34647024 | 3.99883523 |
| C | 12.19717980 | 13.10436314 | 2.34558282 | 4.00116480 |
| C | 10.96160469 | 13.81772541 | 2.34646690 | 3.99883519 |
| C | 10.96160475 | 15.24441668 | 2.34558018 | 4.00116483 |
| C | 12.19717988 | 15.95777900 | 2.34646612 | 3.99883516 |
| C | 12.19717994 | 17.38447031 | 2.34557970 | 4.00116484 |
| C | 10.96160482 | 18.09783258 | 2.34646438 | 3.99883517 |
| C | 10.96160484 | 19.52452389 | 2.34557806 | 4.00116481 |
| C | 12.19717997 | 20.23788620 | 2.34646348 | 3.99883521 |
| C | 12.19717996 | 21.66457748 | 2.34557311 | 4.00116477 |
| C | 10.96160482 | 22.37793970 | 2.34645510 | 3.99883526 |
| C | 10.96160480 | 23.80463094 | 2.34556737 | 4.00116476 |
| C | 12.19717992 | 24.51799321 | 2.34645481 | 3.99883524 |
| C | 14.66833012 | 0.26404177  | 2.34557455 | 4.00116480 |
| C | 13.43275498 | 0.97740395  | 2.34646336 | 3.99883516 |

|   |             |             |            |            |
|---|-------------|-------------|------------|------------|
| C | 13.43275499 | 2.40409522  | 2.34558099 | 4.00116484 |
| C | 14.66833010 | 3.11745758  | 2.34646649 | 3.99883513 |
| C | 14.66833010 | 4.54414889  | 2.34557960 | 4.00116483 |
| C | 13.43275497 | 5.25751114  | 2.34646525 | 3.99883517 |
| C | 13.43275495 | 6.68420247  | 2.34558093 | 4.00116480 |
| C | 14.66833005 | 7.39756480  | 2.34646788 | 3.99883523 |
| C | 14.66833003 | 8.82425610  | 2.34558578 | 4.00116477 |
| C | 13.43275490 | 9.53761836  | 2.34647266 | 3.99883524 |
| C | 13.43275489 | 10.96430962 | 2.34558654 | 4.00116477 |
| C | 14.66833001 | 11.67767191 | 2.34647098 | 3.99883522 |
| C | 14.66833004 | 13.10436316 | 2.34558334 | 4.00116480 |
| C | 13.43275493 | 13.81772544 | 2.34646859 | 3.99883518 |
| C | 13.43275500 | 15.24441672 | 2.34558162 | 4.00116483 |
| C | 14.66833013 | 15.95777904 | 2.34646610 | 3.99883515 |
| C | 14.66833020 | 17.38447036 | 2.34557994 | 4.00116484 |
| C | 13.43275508 | 18.09783264 | 2.34646630 | 3.99883515 |
| C | 13.43275511 | 19.52452395 | 2.34558009 | 4.00116481 |
| C | 14.66833023 | 20.23788629 | 2.34646419 | 3.99883520 |
| C | 14.66833022 | 21.66457758 | 2.34557393 | 4.00116477 |
| C | 13.43275508 | 22.37793978 | 2.34645717 | 3.99883524 |
| C | 13.43275506 | 23.80463103 | 2.34556930 | 4.00116476 |
| C | 14.66833017 | 24.51799334 | 2.34645530 | 3.99883523 |
| C | 17.13948037 | 0.26404189  | 2.34557238 | 4.00116479 |
| C | 15.90390523 | 0.97740410  | 2.34646172 | 3.99883517 |
| C | 15.90390524 | 2.40409537  | 2.34557935 | 4.00116483 |
| C | 17.13948036 | 3.11745769  | 2.34646446 | 3.99883515 |
| C | 17.13948037 | 4.54414900  | 2.34557747 | 4.00116483 |
| C | 15.90390521 | 5.25751124  | 2.34646343 | 3.99883518 |
| C | 15.90390520 | 6.68420255  | 2.34557912 | 4.00116480 |
| C | 17.13948032 | 7.39756485  | 2.34646585 | 3.99883524 |
| C | 17.13948029 | 8.82425614  | 2.34558395 | 4.00116476 |
| C | 15.90390514 | 9.53761839  | 2.34647134 | 3.99883525 |
| C | 15.90390513 | 10.96430965 | 2.34558524 | 4.00116477 |
| C | 17.13948026 | 11.67767191 | 2.34646909 | 3.99883524 |
| C | 17.13948029 | 13.10436317 | 2.34558134 | 4.00116479 |

|   |             |             |            |            |
|---|-------------|-------------|------------|------------|
| C | 15.90390517 | 13.81772545 | 2.34646687 | 3.99883519 |
| C | 15.90390524 | 15.24441674 | 2.34557958 | 4.00116483 |
| C | 17.13948036 | 15.95777906 | 2.34646366 | 3.99883516 |
| C | 17.13948042 | 17.38447039 | 2.34557756 | 4.00116483 |
| C | 15.90390532 | 18.09783270 | 2.34646445 | 3.99883516 |
| C | 15.90390535 | 19.52452403 | 2.34557851 | 4.00116481 |
| C | 17.13948045 | 20.23788637 | 2.34646219 | 3.99883521 |
| C | 17.13948045 | 21.66457768 | 2.34557202 | 4.00116476 |
| C | 15.90390532 | 22.37793991 | 2.34645573 | 3.99883525 |
| C | 15.90390531 | 23.80463116 | 2.34556760 | 4.00116476 |
| C | 17.13948041 | 24.51799347 | 2.34645295 | 3.99883525 |
| C | 19.61063063 | 0.26404191  | 2.34557357 | 4.00116479 |
| C | 18.37505550 | 0.97740418  | 2.34646112 | 3.99883518 |
| C | 18.37505551 | 2.40409544  | 2.34557880 | 4.00116483 |
| C | 19.61063067 | 3.11745770  | 2.34646566 | 3.99883514 |
| C | 19.61063067 | 4.54414901  | 2.34557865 | 4.00116483 |
| C | 18.37505551 | 5.25751129  | 2.34646277 | 3.99883519 |
| C | 18.37505548 | 6.68420260  | 2.34557851 | 4.00116479 |
| C | 19.61063065 | 7.39756487  | 2.34646710 | 3.99883524 |
| C | 19.61063060 | 8.82425616  | 2.34558513 | 4.00116477 |
| C | 18.37505543 | 9.53761840  | 2.34647085 | 3.99883526 |
| C | 18.37505541 | 10.96430966 | 2.34558465 | 4.00116477 |
| C | 19.61063056 | 11.67767193 | 2.34647019 | 3.99883523 |
| C | 19.61063056 | 13.10436319 | 2.34558255 | 4.00116480 |
| C | 18.37505542 | 13.81772546 | 2.34646626 | 3.99883520 |
| C | 18.37505547 | 15.24441675 | 2.34557881 | 4.00116482 |
| C | 19.61063062 | 15.95777907 | 2.34646495 | 3.99883516 |
| C | 19.61063066 | 17.38447041 | 2.34557877 | 4.00116484 |
| C | 18.37505554 | 18.09783273 | 2.34646368 | 3.99883517 |
| C | 18.37505556 | 19.52452407 | 2.34557782 | 4.00116481 |
| C | 19.61063069 | 20.23788638 | 2.34646340 | 3.99883520 |
| C | 19.61063068 | 21.66457769 | 2.34557327 | 4.00116477 |
| C | 18.37505555 | 22.37793997 | 2.34645513 | 3.99883526 |
| C | 18.37505554 | 23.80463123 | 2.34556677 | 4.00116475 |
| C | 19.61063068 | 24.51799347 | 2.34645417 | 3.99883524 |

|   |             |             |            |            |
|---|-------------|-------------|------------|------------|
| C | 22.08178098 | 0.26404182  | 2.34557481 | 4.00116480 |
| C | 20.84620582 | 0.97740412  | 2.34646312 | 3.99883516 |
| C | 20.84620583 | 2.40409540  | 2.34558075 | 4.00116484 |
| C | 22.08178103 | 3.11745763  | 2.34646676 | 3.99883513 |
| C | 22.08178104 | 4.54414895  | 2.34557989 | 4.00116484 |
| C | 20.84620586 | 5.25751127  | 2.34646484 | 3.99883518 |
| C | 20.84620583 | 6.68420259  | 2.34558061 | 4.00116480 |
| C | 22.08178101 | 7.39756485  | 2.34646829 | 3.99883522 |
| C | 22.08178097 | 8.82425617  | 2.34558603 | 4.00116478 |
| C | 20.84620577 | 9.53761842  | 2.34647261 | 3.99883524 |
| C | 20.84620574 | 10.96430969 | 2.34558643 | 4.00116478 |
| C | 22.08178092 | 11.67767196 | 2.34647110 | 3.99883522 |
| C | 22.08178092 | 13.10436324 | 2.34558364 | 4.00116480 |
| C | 20.84620573 | 13.81772548 | 2.34646838 | 3.99883518 |
| C | 20.84620577 | 15.24441678 | 2.34558116 | 4.00116483 |
| C | 22.08178096 | 15.95777909 | 2.34646656 | 3.99883514 |
| C | 22.08178100 | 17.38447042 | 2.34558023 | 4.00116484 |
| C | 20.84620582 | 18.09783272 | 2.34646581 | 3.99883515 |
| C | 20.84620584 | 19.52452406 | 2.34557984 | 4.00116481 |
| C | 22.08178103 | 20.23788633 | 2.34646441 | 3.99883519 |
| C | 22.08178101 | 21.66457764 | 2.34557424 | 4.00116478 |
| C | 20.84620584 | 22.37793993 | 2.34645722 | 3.99883524 |
| C | 20.84620583 | 23.80463119 | 2.34556905 | 4.00116476 |
| C | 22.08178102 | 24.51799338 | 2.34645564 | 3.99883523 |
| C | 24.55293138 | 0.26404174  | 2.34557292 | 4.00116479 |
| C | 23.31735619 | 0.97740402  | 2.34646231 | 3.99883516 |
| C | 23.31735621 | 2.40409531  | 2.34557996 | 4.00116484 |
| C | 24.55293140 | 3.11745757  | 2.34646496 | 3.99883515 |
| C | 24.55293141 | 4.54414890  | 2.34557818 | 4.00116483 |
| C | 23.31735623 | 5.25751122  | 2.34646435 | 3.99883518 |
| C | 23.31735621 | 6.68420256  | 2.34558011 | 4.00116480 |
| C | 24.55293138 | 7.39756485  | 2.34646658 | 3.99883524 |
| C | 24.55293135 | 8.82425617  | 2.34558401 | 4.00116477 |
| C | 23.31735615 | 9.53761844  | 2.34647158 | 3.99883524 |
| C | 23.31735612 | 10.96430973 | 2.34558543 | 4.00116478 |

|   |             |             |            |            |
|---|-------------|-------------|------------|------------|
| C | 24.55293131 | 11.67767199 | 2.34646905 | 3.99883524 |
| C | 24.55293132 | 13.10436327 | 2.34558168 | 4.00116480 |
| C | 23.31735612 | 13.81772552 | 2.34646770 | 3.99883518 |
| C | 23.31735616 | 15.24441682 | 2.34558083 | 4.00116483 |
| C | 24.55293138 | 15.95777910 | 2.34646508 | 3.99883516 |
| C | 24.55293142 | 17.38447043 | 2.34557853 | 4.00116484 |
| C | 23.31735621 | 18.09783271 | 2.34646523 | 3.99883516 |
| C | 23.31735623 | 19.52452404 | 2.34557902 | 4.00116481 |
| C | 24.55293144 | 20.23788629 | 2.34646231 | 3.99883521 |
| C | 24.55293143 | 21.66457759 | 2.34557202 | 4.00116477 |
| C | 23.31735622 | 22.37793984 | 2.34645625 | 3.99883525 |
| C | 23.31735621 | 23.80463110 | 2.34556845 | 4.00116476 |
| C | 24.55293142 | 24.51799330 | 2.34645384 | 3.99883524 |
| C | 27.02408177 | 0.26404178  | 2.34557426 | 4.00116479 |
| C | 25.78850657 | 0.97740400  | 2.34646146 | 3.99883518 |
| C | 25.78850659 | 2.40409529  | 2.34557920 | 4.00116483 |
| C | 27.02408176 | 3.11745760  | 2.34646635 | 3.99883514 |
| C | 27.02408177 | 4.54414894  | 2.34557944 | 4.00116483 |
| C | 25.78850659 | 5.25751121  | 2.34646359 | 3.99883519 |
| C | 25.78850657 | 6.68420256  | 2.34557946 | 4.00116480 |
| C | 27.02408174 | 7.39756487  | 2.34646801 | 3.99883523 |
| C | 27.02408171 | 8.82425618  | 2.34558541 | 4.00116477 |
| C | 25.78850652 | 9.53761845  | 2.34647062 | 3.99883525 |
| C | 25.78850650 | 10.96430974 | 2.34558449 | 4.00116477 |
| C | 27.02408169 | 11.67767199 | 2.34647040 | 3.99883523 |
| C | 27.02408172 | 13.10436327 | 2.34558306 | 4.00116480 |
| C | 25.78850653 | 13.81772553 | 2.34646693 | 3.99883519 |
| C | 25.78850658 | 15.24441683 | 2.34558026 | 4.00116483 |
| C | 27.02408180 | 15.95777911 | 2.34646649 | 3.99883516 |
| C | 27.02408185 | 17.38447043 | 2.34557983 | 4.00116484 |
| C | 25.78850665 | 18.09783271 | 2.34646436 | 3.99883517 |
| C | 25.78850666 | 19.52452404 | 2.34557808 | 4.00116481 |
| C | 27.02408187 | 20.23788631 | 2.34646370 | 3.99883521 |
| C | 27.02408186 | 21.66457762 | 2.34557342 | 4.00116477 |
| C | 25.78850664 | 22.37793982 | 2.34645527 | 3.99883526 |

|   |             |             |            |            |
|---|-------------|-------------|------------|------------|
| C | 25.78850662 | 23.80463108 | 2.34556761 | 4.00116476 |
| C | 27.02408181 | 24.51799334 | 2.34645514 | 3.99883524 |
| C | 29.49523216 | 0.26404188  | 2.34557435 | 4.00116480 |
| C | 28.25965695 | 0.97740408  | 2.34646346 | 3.99883516 |
| C | 28.25965696 | 2.40409537  | 2.34558120 | 4.00116484 |
| C | 29.49523214 | 3.11745769  | 2.34646647 | 3.99883513 |
| C | 29.49523215 | 4.54414901  | 2.34557946 | 4.00116484 |
| C | 28.25965695 | 5.25751126  | 2.34646535 | 3.99883518 |
| C | 28.25965693 | 6.68420260  | 2.34558127 | 4.00116480 |
| C | 29.49523212 | 7.39756489  | 2.34646803 | 3.99883523 |
| C | 29.49523210 | 8.82425620  | 2.34558576 | 4.00116477 |
| C | 28.25965689 | 9.53761845  | 2.34647273 | 3.99883524 |
| C | 28.25965688 | 10.96430973 | 2.34558654 | 4.00116478 |
| C | 29.49523209 | 11.67767198 | 2.34647077 | 3.99883522 |
| C | 29.49523212 | 13.10436325 | 2.34558326 | 4.00116480 |
| C | 28.25965693 | 13.81772552 | 2.34646885 | 3.99883518 |
| C | 28.25965699 | 15.24441682 | 2.34558201 | 4.00116483 |
| C | 29.49523220 | 15.95777910 | 2.34646617 | 3.99883515 |
| C | 29.49523226 | 17.38447044 | 2.34557976 | 4.00116484 |
| C | 28.25965707 | 18.09783273 | 2.34646622 | 3.99883516 |
| C | 28.25965708 | 19.52452407 | 2.34558010 | 4.00116481 |
| C | 29.49523228 | 20.23788637 | 2.34646409 | 3.99883520 |
| C | 29.49523226 | 21.66457768 | 2.34557387 | 4.00116477 |
| C | 28.25965705 | 22.37793989 | 2.34645735 | 3.99883524 |
| C | 28.25965703 | 23.80463115 | 2.34556944 | 4.00116476 |
| C | 29.49523221 | 24.51799344 | 2.34645508 | 3.99883523 |
| C | 3.54814234  | 0.96965907  | 5.59612480 | 3.99883522 |
| C | 2.31256732  | 1.68302172  | 5.59700643 | 4.00116480 |
| C | 2.31256729  | 3.10971312  | 5.59611956 | 3.99883519 |
| C | 3.54814239  | 3.82307539  | 5.59700882 | 4.00116479 |
| C | 3.54814241  | 5.24976667  | 5.59613417 | 3.99883522 |
| C | 2.31256740  | 5.96312900  | 5.59702630 | 4.00116476 |
| C | 2.31256746  | 7.38982016  | 5.59615072 | 3.99883525 |
| C | 3.54814254  | 8.10318236  | 5.59703971 | 4.00116474 |
| C | 3.54814269  | 9.52987352  | 5.59615579 | 3.99883526 |



|   |            |             |            |            |
|---|------------|-------------|------------|------------|
| C | 2.31256760 | 10.24323564 | 5.59704016 | 4.00116474 |
| C | 2.31256766 | 11.66992678 | 5.59614895 | 3.99883525 |
| C | 3.54814280 | 12.38328897 | 5.59703052 | 4.00116476 |
| C | 3.54814286 | 13.80998011 | 5.59613484 | 3.99883522 |
| C | 2.31256768 | 14.52334224 | 5.59701585 | 4.00116479 |
| C | 2.31256757 | 15.95003342 | 5.59612508 | 3.99883519 |
| C | 3.54814275 | 16.66339552 | 5.59701076 | 4.00116480 |
| C | 3.54814268 | 18.09008673 | 5.59612773 | 3.99883520 |
| C | 2.31256752 | 18.80344907 | 5.59701589 | 4.00116479 |
| C | 2.31256736 | 20.23014039 | 5.59613723 | 3.99883523 |
| C | 3.54814252 | 20.94350258 | 5.59702703 | 4.00116475 |
| C | 3.54814246 | 22.37019398 | 5.59614642 | 3.99883529 |
| C | 2.31256736 | 23.08355659 | 5.59703192 | 4.00116474 |
| C | 2.31256725 | 24.51024807 | 5.59613992 | 3.99883528 |
| C | 3.54814242 | 25.22361037 | 5.59702032 | 4.00116477 |
| C | 6.01929264 | 0.96965955  | 5.59612048 | 3.99883519 |
| C | 4.78371740 | 1.68302165  | 5.59700471 | 4.00116481 |
| C | 4.78371747 | 3.10971308  | 5.59611787 | 3.99883518 |
| C | 6.01929250 | 3.82307574  | 5.59700442 | 4.00116482 |
| C | 6.01929258 | 5.24976703  | 5.59612992 | 3.99883519 |
| C | 4.78371745 | 5.96312907  | 5.59702453 | 4.00116477 |
| C | 4.78371761 | 7.38982027  | 5.59614904 | 3.99883524 |
| C | 6.01929267 | 8.10318271  | 5.59703549 | 4.00116476 |
| C | 6.01929292 | 9.52987390  | 5.59615158 | 3.99883522 |
| C | 4.78371778 | 10.24323585 | 5.59703844 | 4.00116475 |
| C | 4.78371798 | 11.66992701 | 5.59614734 | 3.99883523 |
| C | 6.01929309 | 12.38328944 | 5.59702609 | 4.00116479 |
| C | 6.01929325 | 13.80998063 | 5.59613056 | 3.99883518 |
| C | 4.78371799 | 14.52334242 | 5.59701404 | 4.00116480 |
| C | 4.78371803 | 15.95003358 | 5.59612332 | 3.99883518 |
| C | 6.01929310 | 16.66339614 | 5.59700626 | 4.00116483 |
| C | 6.01929312 | 18.09008736 | 5.59612327 | 3.99883516 |
| C | 4.78371779 | 18.80344913 | 5.59701424 | 4.00116480 |
| C | 4.78371775 | 20.23014042 | 5.59613554 | 3.99883522 |
| C | 6.01929278 | 20.94350320 | 5.59702276 | 4.00116478 |

|   |             |             |            |            |
|---|-------------|-------------|------------|------------|
| C | 6.01929288  | 22.37019458 | 5.59614225 | 3.99883525 |
| C | 4.78371756  | 23.08355655 | 5.59703034 | 4.00116475 |
| C | 4.78371760  | 24.51024802 | 5.59613833 | 3.99883527 |
| C | 6.01929265  | 25.22361086 | 5.59701590 | 4.00116479 |
| C | 8.49044310  | 0.96966049  | 5.59612274 | 3.99883517 |
| C | 7.25486770  | 1.68302242  | 5.59700232 | 4.00116484 |
| C | 7.25486780  | 3.10971383  | 5.59611570 | 3.99883514 |
| C | 8.49044295  | 3.82307646  | 5.59700732 | 4.00116485 |
| C | 8.49044301  | 5.24976773  | 5.59613211 | 3.99883517 |
| C | 7.25486768  | 5.96312957  | 5.59702203 | 4.00116480 |
| C | 7.25486784  | 7.38982077  | 5.59614656 | 3.99883521 |
| C | 8.49044302  | 8.10318318  | 5.59703735 | 4.00116479 |
| C | 8.49044323  | 9.52987439  | 5.59615315 | 3.99883521 |
| C | 7.25486805  | 10.24323634 | 5.59703568 | 4.00116478 |
| C | 7.25486828  | 11.66992756 | 5.59614463 | 3.99883520 |
| C | 8.49044334  | 12.38329014 | 5.59702813 | 4.00116481 |
| C | 8.49044350  | 13.80998140 | 5.59613265 | 3.99883517 |
| C | 7.25486829  | 14.52334325 | 5.59701164 | 4.00116483 |
| C | 7.25486841  | 15.95003447 | 5.59612099 | 3.99883514 |
| C | 8.49044340  | 16.66339720 | 5.59700870 | 4.00116485 |
| C | 8.49044344  | 18.09008845 | 5.59612515 | 3.99883514 |
| C | 7.25486810  | 18.80345017 | 5.59701144 | 4.00116483 |
| C | 7.25486814  | 20.23014146 | 5.59613299 | 3.99883518 |
| C | 8.49044321  | 20.94350425 | 5.59702460 | 4.00116481 |
| C | 8.49044330  | 22.37019562 | 5.59614325 | 3.99883522 |
| C | 7.25486793  | 23.08355750 | 5.59702726 | 4.00116479 |
| C | 7.25486802  | 24.51024896 | 5.59613546 | 3.99883523 |
| C | 8.49044313  | 25.22361182 | 5.59701771 | 4.00116482 |
| C | 10.96159364 | 0.96966072  | 5.59612600 | 3.99883517 |
| C | 9.72601833  | 1.68302307  | 5.59700783 | 4.00116486 |
| C | 9.72601833  | 3.10971447  | 5.59612158 | 3.99883515 |
| C | 10.96159363 | 3.82307670  | 5.59701078 | 4.00116485 |
| C | 10.96159357 | 5.24976799  | 5.59613545 | 3.99883518 |
| C | 9.72601825  | 5.96313007  | 5.59702701 | 4.00116482 |
| C | 9.72601832  | 7.38982128  | 5.59615145 | 3.99883521 |

|   |             |             |            |            |
|---|-------------|-------------|------------|------------|
| C | 10.96159354 | 8.10318356  | 5.59704084 | 4.00116480 |
| C | 10.96159358 | 9.52987479  | 5.59615646 | 3.99883521 |
| C | 9.72601836  | 10.24323686 | 5.59704040 | 4.00116480 |
| C | 9.72601849  | 11.66992811 | 5.59614970 | 3.99883520 |
| C | 10.96159361 | 12.38329051 | 5.59703168 | 4.00116482 |
| C | 10.96159366 | 13.80998176 | 5.59613603 | 3.99883517 |
| C | 9.72601853  | 14.52334397 | 5.59701690 | 4.00116484 |
| C | 9.72601860  | 15.95003522 | 5.59612652 | 3.99883514 |
| C | 10.96159374 | 16.66339750 | 5.59701222 | 4.00116486 |
| C | 10.96159372 | 18.09008875 | 5.59612853 | 3.99883515 |
| C | 9.72601853  | 18.80345099 | 5.59701649 | 4.00116484 |
| C | 9.72601853  | 20.23014227 | 5.59613809 | 3.99883518 |
| C | 10.96159377 | 20.94350453 | 5.59702818 | 4.00116481 |
| C | 10.96159373 | 22.37019589 | 5.59614672 | 3.99883523 |
| C | 9.72601848  | 23.08355824 | 5.59703142 | 4.00116480 |
| C | 9.72601848  | 24.51024969 | 5.59614006 | 3.99883523 |
| C | 10.96159375 | 25.22361206 | 5.59702121 | 4.00116483 |
| C | 13.43274409 | 0.96966001  | 5.59612142 | 3.99883517 |
| C | 12.19716898 | 1.68302280  | 5.59700591 | 4.00116485 |
| C | 12.19716883 | 3.10971420  | 5.59611968 | 3.99883514 |
| C | 13.43274409 | 3.82307617  | 5.59700586 | 4.00116484 |
| C | 13.43274390 | 5.24976748  | 5.59613087 | 3.99883517 |
| C | 12.19716882 | 5.96313008  | 5.59702564 | 4.00116482 |
| C | 12.19716875 | 7.38982132  | 5.59615046 | 3.99883520 |
| C | 13.43274397 | 8.10318330  | 5.59703657 | 4.00116479 |
| C | 13.43274387 | 9.52987454  | 5.59615232 | 3.99883521 |
| C | 12.19716876 | 10.24323699 | 5.59703923 | 4.00116479 |
| C | 12.19716876 | 11.66992824 | 5.59614862 | 3.99883520 |
| C | 13.43274404 | 12.38329016 | 5.59702736 | 4.00116481 |
| C | 13.43274400 | 13.80998138 | 5.59613154 | 3.99883517 |
| C | 12.19716888 | 14.52334384 | 5.59701531 | 4.00116484 |
| C | 12.19716883 | 15.95003506 | 5.59612500 | 3.99883514 |
| C | 13.43274413 | 16.66339689 | 5.59700760 | 4.00116484 |
| C | 13.43274406 | 18.09008811 | 5.59612427 | 3.99883515 |
| C | 12.19716899 | 18.80345073 | 5.59701513 | 4.00116484 |

|   |             |             |            |            |
|---|-------------|-------------|------------|------------|
| C | 12.19716892 | 20.23014200 | 5.59613699 | 3.99883518 |
| C | 13.43274424 | 20.94350386 | 5.59702395 | 4.00116479 |
| C | 13.43274412 | 22.37019520 | 5.59614299 | 3.99883524 |
| C | 12.19716903 | 23.08355797 | 5.59703091 | 4.00116479 |
| C | 12.19716894 | 24.51024940 | 5.59613939 | 3.99883523 |
| C | 13.43274427 | 25.22361137 | 5.59701701 | 4.00116480 |
| C | 15.90389437 | 0.96965926  | 5.59612231 | 3.99883520 |
| C | 14.66831934 | 1.68302200  | 5.59700271 | 4.00116482 |
| C | 14.66831912 | 3.10971340  | 5.59611622 | 3.99883516 |
| C | 15.90389428 | 3.82307541  | 5.59700645 | 4.00116480 |
| C | 15.90389410 | 5.24976668  | 5.59613167 | 3.99883521 |
| C | 14.66831910 | 5.96312937  | 5.59702233 | 4.00116479 |
| C | 14.66831897 | 7.38982061  | 5.59614701 | 3.99883522 |
| C | 15.90389419 | 8.10318240  | 5.59703720 | 4.00116475 |
| C | 15.90389411 | 9.52987362  | 5.59615318 | 3.99883524 |
| C | 14.66831914 | 10.24323635 | 5.59703610 | 4.00116477 |
| C | 14.66831910 | 11.66992758 | 5.59614533 | 3.99883521 |
| C | 15.90389439 | 12.38328934 | 5.59702795 | 4.00116478 |
| C | 15.90389436 | 13.80998056 | 5.59613237 | 3.99883520 |
| C | 14.66831931 | 14.52334314 | 5.59701194 | 4.00116482 |
| C | 14.66831921 | 15.95003434 | 5.59612148 | 3.99883515 |
| C | 15.90389447 | 16.66339616 | 5.59700826 | 4.00116482 |
| C | 15.90389441 | 18.09008737 | 5.59612510 | 3.99883517 |
| C | 14.66831936 | 18.80344991 | 5.59701205 | 4.00116481 |
| C | 14.66831930 | 20.23014116 | 5.59613358 | 3.99883519 |
| C | 15.90389452 | 20.94350312 | 5.59702449 | 4.00116476 |
| C | 15.90389445 | 22.37019444 | 5.59614373 | 3.99883526 |
| C | 14.66831941 | 23.08355712 | 5.59702785 | 4.00116476 |
| C | 14.66831932 | 24.51024853 | 5.59613615 | 3.99883524 |
| C | 15.90389452 | 25.22361063 | 5.59701769 | 4.00116477 |
| C | 18.37504460 | 0.96965916  | 5.59612502 | 3.99883522 |
| C | 17.13946948 | 1.68302152  | 5.59700655 | 4.00116480 |
| C | 17.13946934 | 3.10971288  | 5.59611952 | 3.99883519 |
| C | 18.37504444 | 3.82307517  | 5.59700852 | 4.00116479 |
| C | 18.37504440 | 5.24976640  | 5.59613449 | 3.99883523 |

|   |             |             |            |            |
|---|-------------|-------------|------------|------------|
| C | 17.13946927 | 5.96312865  | 5.59702648 | 4.00116476 |
| C | 17.13946920 | 7.38981983  | 5.59615085 | 3.99883525 |
| C | 18.37504438 | 8.10318190  | 5.59703989 | 4.00116474 |
| C | 18.37504442 | 9.52987309  | 5.59615628 | 3.99883526 |
| C | 17.13946935 | 10.24323548 | 5.59704030 | 4.00116474 |
| C | 17.13946937 | 11.66992671 | 5.59614888 | 3.99883525 |
| C | 18.37504454 | 12.38328883 | 5.59703026 | 4.00116477 |
| C | 18.37504461 | 13.80998010 | 5.59613526 | 3.99883522 |
| C | 17.13946956 | 14.52334249 | 5.59701614 | 4.00116479 |
| C | 17.13946953 | 15.95003371 | 5.59612516 | 3.99883519 |
| C | 18.37504467 | 16.66339588 | 5.59701055 | 4.00116481 |
| C | 18.37504468 | 18.09008712 | 5.59612767 | 3.99883518 |
| C | 17.13946959 | 18.80344941 | 5.59701592 | 4.00116480 |
| C | 17.13946958 | 20.23014066 | 5.59613725 | 3.99883522 |
| C | 18.37504466 | 20.94350301 | 5.59702716 | 4.00116476 |
| C | 18.37504471 | 22.37019435 | 5.59614690 | 3.99883527 |
| C | 17.13946959 | 23.08355667 | 5.59703210 | 4.00116474 |
| C | 17.13946958 | 24.51024807 | 5.59613993 | 3.99883527 |
| C | 18.37504466 | 25.22361054 | 5.59702023 | 4.00116477 |
| C | 20.84619487 | 0.96965974  | 5.59612080 | 3.99883519 |
| C | 19.61061964 | 1.68302177  | 5.59700498 | 4.00116481 |
| C | 19.61061966 | 3.10971312  | 5.59611790 | 3.99883518 |
| C | 20.84619472 | 3.82307575  | 5.59700492 | 4.00116481 |
| C | 20.84619482 | 5.24976698  | 5.59613009 | 3.99883520 |
| C | 19.61061952 | 5.96312874  | 5.59702484 | 4.00116477 |
| C | 19.61061959 | 7.38981991  | 5.59614913 | 3.99883525 |
| C | 20.84619468 | 8.10318243  | 5.59703538 | 4.00116476 |
| C | 20.84619484 | 9.52987362  | 5.59615141 | 3.99883523 |
| C | 19.61061956 | 10.24323542 | 5.59703862 | 4.00116475 |
| C | 19.61061968 | 11.66992667 | 5.59614713 | 3.99883524 |
| C | 20.84619476 | 12.38328925 | 5.59702615 | 4.00116479 |
| C | 20.84619492 | 13.80998051 | 5.59613073 | 3.99883519 |
| C | 19.61061971 | 14.52334249 | 5.59701458 | 4.00116480 |
| C | 19.61061982 | 15.95003375 | 5.59612363 | 3.99883518 |
| C | 20.84619491 | 16.66339626 | 5.59700674 | 4.00116483 |

|   |             |             |            |            |
|---|-------------|-------------|------------|------------|
| C | 20.84619497 | 18.09008753 | 5.59612348 | 3.99883516 |
| C | 19.61061975 | 18.80344954 | 5.59701431 | 4.00116481 |
| C | 19.61061980 | 20.23014084 | 5.59613565 | 3.99883521 |
| C | 20.84619486 | 20.94350345 | 5.59702283 | 4.00116478 |
| C | 20.84619498 | 22.37019483 | 5.59614188 | 3.99883525 |
| C | 19.61061977 | 23.08355692 | 5.59703035 | 4.00116476 |
| C | 19.61061984 | 24.51024834 | 5.59613822 | 3.99883526 |
| C | 20.84619487 | 25.22361110 | 5.59701602 | 4.00116479 |
| C | 23.31734516 | 0.96966058  | 5.59612204 | 3.99883517 |
| C | 22.08176990 | 1.68302256  | 5.59700229 | 4.00116483 |
| C | 22.08177000 | 3.10971392  | 5.59611589 | 3.99883515 |
| C | 23.31734505 | 3.82307663  | 5.59700670 | 4.00116483 |
| C | 23.31734515 | 5.24976787  | 5.59613147 | 3.99883517 |
| C | 22.08176988 | 5.96312963  | 5.59702171 | 4.00116479 |
| C | 22.08177002 | 7.38982081  | 5.59614628 | 3.99883521 |
| C | 23.31734510 | 8.10318343  | 5.59703705 | 4.00116479 |
| C | 23.31734528 | 9.52987461  | 5.59615269 | 3.99883521 |
| C | 22.08176993 | 10.24323630 | 5.59703536 | 4.00116478 |
| C | 22.08177010 | 11.66992751 | 5.59614468 | 3.99883521 |
| C | 23.31734528 | 12.38329006 | 5.59702803 | 4.00116482 |
| C | 23.31734542 | 13.80998129 | 5.59613204 | 3.99883517 |
| C | 22.08177006 | 14.52334310 | 5.59701140 | 4.00116483 |
| C | 22.08177020 | 15.95003436 | 5.59612110 | 3.99883514 |
| C | 23.31734536 | 16.66339689 | 5.59700838 | 4.00116486 |
| C | 23.31734537 | 18.09008819 | 5.59612494 | 3.99883514 |
| C | 22.08177006 | 18.80345013 | 5.59701151 | 4.00116483 |
| C | 22.08177012 | 20.23014147 | 5.59613304 | 3.99883518 |
| C | 23.31734519 | 20.94350418 | 5.59702450 | 4.00116481 |
| C | 23.31734529 | 22.37019560 | 5.59614330 | 3.99883523 |
| C | 22.08177003 | 23.08355762 | 5.59702693 | 4.00116478 |
| C | 22.08177012 | 24.51024908 | 5.59613542 | 3.99883524 |
| C | 23.31734515 | 25.22361193 | 5.59701762 | 4.00116481 |
| C | 25.78849542 | 0.96966106  | 5.59612522 | 3.99883517 |
| C | 24.55292022 | 1.68302328  | 5.59700657 | 4.00116484 |
| C | 24.55292026 | 3.10971463  | 5.59612058 | 3.99883514 |

|   |             |             |            |            |
|---|-------------|-------------|------------|------------|
| C | 25.78849538 | 3.82307702  | 5.59701024 | 4.00116484 |
| C | 25.78849537 | 5.24976823  | 5.59613469 | 3.99883517 |
| C | 24.55292022 | 5.96313037  | 5.59702625 | 4.00116481 |
| C | 24.55292033 | 7.38982153  | 5.59615118 | 3.99883521 |
| C | 25.78849554 | 8.10318366  | 5.59704019 | 4.00116479 |
| C | 25.78849564 | 9.52987481  | 5.59615560 | 3.99883521 |
| C | 24.55292048 | 10.24323698 | 5.59703982 | 4.00116479 |
| C | 24.55292061 | 11.66992818 | 5.59614953 | 3.99883520 |
| C | 25.78849589 | 12.38329030 | 5.59703125 | 4.00116482 |
| C | 25.78849590 | 13.80998153 | 5.59613525 | 3.99883516 |
| C | 24.55292065 | 14.52334366 | 5.59701582 | 4.00116485 |
| C | 24.55292066 | 15.95003492 | 5.59612578 | 3.99883514 |
| C | 25.78849581 | 16.66339727 | 5.59701182 | 4.00116487 |
| C | 25.78849571 | 18.09008858 | 5.59612810 | 3.99883514 |
| C | 24.55292048 | 18.80345075 | 5.59701594 | 4.00116485 |
| C | 24.55292046 | 20.23014211 | 5.59613776 | 3.99883518 |
| C | 25.78849557 | 20.94350462 | 5.59702759 | 4.00116482 |
| C | 25.78849553 | 22.37019604 | 5.59614606 | 3.99883523 |
| C | 24.55292035 | 23.08355834 | 5.59703153 | 4.00116480 |
| C | 24.55292039 | 24.51024981 | 5.59614020 | 3.99883523 |
| C | 25.78849548 | 25.22361242 | 5.59702071 | 4.00116482 |
| C | 28.25964566 | 0.96966070  | 5.59612155 | 3.99883517 |
| C | 27.02407059 | 1.68302336  | 5.59700599 | 4.00116485 |
| C | 27.02407053 | 3.10971469  | 5.59611987 | 3.99883514 |
| C | 28.25964579 | 3.82307661  | 5.59700615 | 4.00116483 |
| C | 28.25964571 | 5.24976780  | 5.59613088 | 3.99883517 |
| C | 27.02407060 | 5.96313020  | 5.59702516 | 4.00116481 |
| C | 27.02407063 | 7.38982131  | 5.59614966 | 3.99883520 |
| C | 28.25964595 | 8.10318304  | 5.59703602 | 4.00116478 |
| C | 28.25964596 | 9.52987417  | 5.59615175 | 3.99883521 |
| C | 27.02407094 | 10.24323669 | 5.59703846 | 4.00116479 |
| C | 27.02407098 | 11.66992788 | 5.59614803 | 3.99883520 |
| C | 28.25964621 | 12.38328976 | 5.59702691 | 4.00116480 |
| C | 28.25964612 | 13.80998100 | 5.59613144 | 3.99883516 |
| C | 27.02407110 | 14.52334361 | 5.59701505 | 4.00116485 |

|   |             |             |            |            |
|---|-------------|-------------|------------|------------|
| C | 27.02407095 | 15.95003488 | 5.59612491 | 3.99883513 |
| C | 28.25964610 | 16.66339688 | 5.59700771 | 4.00116485 |
| C | 28.25964591 | 18.09008818 | 5.59612411 | 3.99883514 |
| C | 27.02407085 | 18.80345082 | 5.59701491 | 4.00116485 |
| C | 27.02407071 | 20.23014217 | 5.59613644 | 3.99883517 |
| C | 28.25964590 | 20.94350424 | 5.59702346 | 4.00116481 |
| C | 28.25964570 | 22.37019565 | 5.59614208 | 3.99883522 |
| C | 27.02407066 | 23.08355842 | 5.59702979 | 4.00116480 |
| C | 27.02407059 | 24.51024989 | 5.59613852 | 3.99883522 |
| C | 28.25964579 | 25.22361205 | 5.59701663 | 4.00116481 |
| C | 30.73079591 | 0.96965970  | 5.59612254 | 3.99883520 |
| C | 29.49522094 | 1.68302262  | 5.59700281 | 4.00116482 |
| C | 29.49522084 | 3.10971397  | 5.59611615 | 3.99883516 |
| C | 30.73079610 | 3.82307581  | 5.59700639 | 4.00116480 |
| C | 30.73079604 | 5.24976704  | 5.59613202 | 3.99883521 |
| C | 29.49522101 | 5.96312952  | 5.59702251 | 4.00116478 |
| C | 29.49522101 | 7.38982063  | 5.59614692 | 3.99883522 |
| C | 30.73079623 | 8.10318249  | 5.59703738 | 4.00116475 |
| C | 30.73079625 | 9.52987362  | 5.59615359 | 3.99883524 |
| C | 29.49522120 | 10.24323599 | 5.59703606 | 4.00116476 |
| C | 29.49522119 | 11.66992717 | 5.59614498 | 3.99883521 |
| C | 30.73079637 | 12.38328911 | 5.59702792 | 4.00116477 |
| C | 30.73079631 | 13.80998029 | 5.59613264 | 3.99883520 |
| C | 29.49522129 | 14.52334288 | 5.59701222 | 4.00116482 |
| C | 29.49522108 | 15.95003412 | 5.59612160 | 3.99883515 |
| C | 30.73079628 | 16.66339595 | 5.59700825 | 4.00116482 |
| C | 30.73079610 | 18.09008720 | 5.59612522 | 3.99883517 |
| C | 29.49522112 | 18.80345003 | 5.59701194 | 4.00116482 |
| C | 29.49522090 | 20.23014137 | 5.59613350 | 3.99883518 |
| C | 30.73079613 | 20.94350323 | 5.59702472 | 4.00116477 |
| C | 30.73079592 | 22.37019464 | 5.59614416 | 3.99883526 |
| C | 29.49522093 | 23.08355762 | 5.59702767 | 4.00116478 |
| C | 29.49522078 | 24.51024910 | 5.59613591 | 3.99883524 |
| C | 30.73079605 | 25.22361103 | 5.59701782 | 4.00116478 |



---

## References

- [1] Mohammad Wahiduzzaman, Augusto F. Oliveira, Pier Philipsen, Lyuben Zhechkov, Erik van Lenthe, Henryk A. Witek, and Thomas Heine. DFTB parameters for the periodic table: Part 1, electronic structure. *J. Chem. Theory Comput.*, 9(9):4006–4017, aug 2013.
- [2] Michael Gaus, Albrecht Goez, and Marcus Elstner. Parametrization and benchmark of DFTB3 for organic molecules. *J. Chem. Theory Comput.*, 9(1):338–354, November 2012.
